# Supplementary material for: Incarceration history and risk of HIV and hepatitis C virus acquisition among people who inject drugs: a systematic review and meta-analysis
Source: PubMed Central journal article supplement (PMC6280039; doi:10.1016/s1473-3099(18)30469-9), 2018-12
Supplement: mmc1.pdf [file mmc1.pdf]

# THE LANCET Infectious Diseases

## Supplementary webappendix

This webappendix formed part of the original submission and has been peer reviewed. We post it as supplied by the authors.

Supplement to: Stone J, Fraser H, Lim AG, et al. Incarceration history and risk of HIV and hepatitis C virus acquisition among people who inject drugs: a systematic review and meta-analysis. *Lancet Infect Dis* 2018; published online Oct 29. [http://dx.doi.org/10.1016/S1473-3099\(18\)30469-9](http://dx.doi.org/10.1016/S1473-3099(18)30469-9).

## Appendix

### Prisma Checklist

| Section/topic                      | #  | Checklist item                                                                                                                                                                                                                                                                                              | Reported on page #    |
|------------------------------------|----|-------------------------------------------------------------------------------------------------------------------------------------------------------------------------------------------------------------------------------------------------------------------------------------------------------------|-----------------------|
| <b>TITLE</b>                       |    |                                                                                                                                                                                                                                                                                                             |                       |
| Title                              | 1  | Identify the report as a systematic review, meta-analysis, or both.                                                                                                                                                                                                                                         | 1                     |
| <b>ABSTRACT</b>                    |    |                                                                                                                                                                                                                                                                                                             |                       |
| Structured summary                 | 2  | Provide a structured summary including, as applicable: background; objectives; data sources; study eligibility criteria, participants, and interventions; study appraisal and synthesis methods; results; limitations; conclusions and implications of key findings; systematic review registration number. | 2                     |
| <b>INTRODUCTION</b>                |    |                                                                                                                                                                                                                                                                                                             |                       |
| Rationale                          | 3  | Describe the rationale for the review in the context of what is already known.                                                                                                                                                                                                                              | 5                     |
| Objectives                         | 4  | Provide an explicit statement of questions being addressed with reference to participants, interventions, comparisons, outcomes, and study design (PICOS).                                                                                                                                                  | 5                     |
| <b>METHODS</b>                     |    |                                                                                                                                                                                                                                                                                                             |                       |
| Protocol and registration          | 5  | Indicate if a review protocol exists, if and where it can be accessed (e.g., Web address), and, if available, provide registration information including registration number.                                                                                                                               | 7                     |
| Eligibility criteria               | 6  | Specify study characteristics (e.g., PICOS, length of follow-up) and report characteristics (e.g., years considered, language, publication status) used as criteria for eligibility, giving rationale.                                                                                                      | 6                     |
| Information sources                | 7  | Describe all information sources (e.g., databases with dates of coverage, contact with study authors to identify additional studies) in the search and date last searched.                                                                                                                                  | 5,6                   |
| Search                             | 8  | Present full electronic search strategy for at least one database, including any limits used, such that it could be repeated.                                                                                                                                                                               | Appendix: 3-4         |
| Study selection                    | 9  | State the process for selecting studies (i.e., screening, eligibility, included in systematic review, and, if applicable, included in the meta-analysis).                                                                                                                                                   | 6                     |
| Data collection process            | 10 | Describe method of data extraction from reports (e.g., piloted forms, independently, in duplicate) and any processes for obtaining and confirming data from investigators.                                                                                                                                  | 6,7                   |
| Data items                         | 11 | List and define all variables for which data were sought (e.g., PICOS, funding sources) and any assumptions and simplifications made.                                                                                                                                                                       | Appendix: 4           |
| Risk of bias in individual studies | 12 | Describe methods used for assessing risk of bias of individual studies (including specification of whether this was done at the study or outcome level), and how this information is to be used in any data synthesis.                                                                                      | 7                     |
| Summary measures                   | 13 | State the principal summary measures (e.g., risk ratio, difference in means).                                                                                                                                                                                                                               | 6,7                   |
| Synthesis of results               | 14 | Describe the methods of handling data and combining results of studies, if done, including measures of consistency (e.g., $I^2$ ) for each meta-analysis.                                                                                                                                                   | 7                     |
| Risk of bias across studies        | 15 | Specify any assessment of risk of bias that may affect the cumulative evidence (e.g., publication bias, selective reporting within studies).                                                                                                                                                                | 7                     |
| Additional analyses                | 16 | Describe methods of additional analyses (e.g., sensitivity or subgroup analyses, meta-regression), if done, indicating which were pre-specified.                                                                                                                                                            | 7                     |
| <b>RESULTS</b>                     |    |                                                                                                                                                                                                                                                                                                             |                       |
| Study selection                    | 17 | Give numbers of studies screened, assessed for eligibility, and included in the review, with reasons for exclusions at each stage, ideally with a flow diagram.                                                                                                                                             | 8,9                   |
| Study characteristics              | 18 | For each study, present characteristics for which data were extracted (e.g., study size, PICOS, follow-up period) and provide the citations.                                                                                                                                                                | 10-12, Appendix 12-21 |

|                               |    |                                                                                                                                                                                                          |                   |
|-------------------------------|----|----------------------------------------------------------------------------------------------------------------------------------------------------------------------------------------------------------|-------------------|
| Risk of bias within studies   | 19 | Present data on risk of bias of each study and, if available, any outcome level assessment (see item 12).                                                                                                | Appendix: 6-11    |
| Results of individual studies | 20 | For all outcomes considered (benefits or harms), present, for each study: (a) simple summary data for each intervention group (b) effect estimates and confidence intervals, ideally with a forest plot. | 14, 15, 17, 18    |
| Synthesis of results          | 21 | Present results of each meta-analysis done, including confidence intervals and measures of consistency.                                                                                                  | 13-18             |
| Risk of bias across studies   | 22 | Present results of any assessment of risk of bias across studies (see Item 15).                                                                                                                          | 19                |
| Additional analysis           | 23 | Give results of additional analyses, if done (e.g., sensitivity or subgroup analyses, meta-regression [see Item 16]).                                                                                    | 13, 15, 16, 18,19 |
| <b>DISCUSSION</b>             |    | s                                                                                                                                                                                                        |                   |
| Summary of evidence           | 24 | Summarize the main findings including the strength of evidence for each main outcome; consider their relevance to key groups (e.g., healthcare providers, users, and policy makers).                     | 19                |
| Limitations                   | 25 | Discuss limitations at study and outcome level (e.g., risk of bias), and at review-level (e.g., incomplete retrieval of identified research, reporting bias).                                            | 19,20             |
| Conclusions                   | 26 | Provide a general interpretation of the results in the context of other evidence, and implications for future research.                                                                                  | 22                |
| <b>FUNDING</b>                |    |                                                                                                                                                                                                          |                   |
| Funding                       | 27 | Describe sources of funding for the systematic review and other support (e.g., supply of data); role of funders for the systematic review.                                                               | 8                 |

## Search Strategy

Below is the search strategy utilised in MEDLINE to identify potentially relevant studies. Keywords are listed in regular type and Medical Subject Heading (MESH) terms in **bold**.

1. hepatitis C OR HCV OR **exp hepatitis C/**
2. HIV OR "human immunodeficiency virus" OR **exp HIV Seropositivity/ OR exp HIV Seroprevalence/ OR exp HIV Infections/ OR exp HIV/**
3. 1 OR 2
4. IDU OR IDUs OR IVDU OR IVDU<sub>s</sub> OR PWID OR PWID<sub>s</sub>
5. substance\* OR drug\*
6. inject\* OR intravenous
7. abuse\* OR depend\* OR use\* OR misus\* OR addict\*
8. 5 adj3 6
9. 5 adj3 7
10. **exp substance abuse, intravenous/**
11. 4 OR 8 OR 9 OR 10
12. prevalence OR incidence OR epidemiol\* OR survey OR rapid assessment OR situation assessment OR situational assessment OR RAR OR Cohort OR surveillance OR seroprevalence OR seroincidence OR seroepidemiol\* OR seroconv\* OR screening OR **exp epidemiologic methods/ OR exp epidemiologic studies/ OR exp sentinel surveillance/ OR exp seroepidemiologic studies/ OR exp cohort studies/ OR exp cross-sectional studies/ OR exp longitudinal studies/ OR exp follow-up studies/ OR exp prospective studies/**
13. 3 AND 11 AND 12
14. Limit 13: Animals/ NOT (Humans/ AND Animals/)
15. 13 NOT 14

Below is the search strategy utilised in Embase to identify potentially relevant studies. Keywords are listed in regular type and Emtree terms in **bold**.

1. hepatitis C OR HCV OR **exp hepatitis C/ OR exp Hepatitis C virus/**
2. HIV OR "human immunodeficiency virus" OR **exp Human immunodeficiency virus OR exp Human immunodeficiency virus infection/ OR exp Human immunodeficiency virus prevalence/**
3. 1 OR 2
4. IDU OR IDUs OR IVDU OR IVDU<sub>s</sub> OR PWID OR PWID<sub>s</sub>
5. substance\* OR drug\*
6. inject\* OR intravenous
7. abuse\* OR depend\* OR use\* OR misus\* OR addict\*
8. 5 adj3 6
9. 5 adj3 7
10. **exp intravenous drug abuse/**
11. 4 OR 8 OR 9 OR 10
12. prevalence OR incidence OR epidemiol\* OR survey OR rapid assessment OR situation assessment OR situational assessment OR RAR OR Cohort OR surveillance OR seroprevalence OR seroincidence OR screening OR **exp seroepidemiology/ OR exp seroprevalence/ OR exp epidemiology/ OR exp prevalence/ OR exp epidemiological data/ OR exp incidence/ OR exp observational study/ OR exp cohort analysis/**
13. 3 AND 11 AND 12
14. Limit 13: Animals/ NOT (Humans/ AND Animals/)
15. 13 NOT 14

Below is the search strategy utilised in PsycINFO to identify potentially relevant studies. Keywords are listed in regular type and Thesaurus terms in **bold**.

1. hepatitis C OR HCV OR **exp Hepatitis/**

2. HIV OR "human immunodeficiency virus" OR **exp HIV/**
3. 1 OR 2
4. IDU OR IDUs OR IVDU OR IVDU<sub>s</sub> OR PWID OR PWID<sub>s</sub>
5. substance\* OR drug\*
6. inject\* OR intravenous
7. abuse\* OR depend\* OR use\* OR misus\* OR addict\*
8. 5 adj3 6
9. 5 adj3 7
10. **exp Intravenous Drug Usage/**
11. 4 OR 8 OR 9 OR 10
12. prevalence OR incidence OR epidemiol\* OR survey OR rapid assessment OR situation assessment OR situational assessment OR RAR OR Cohort OR surveillance OR seroprevalence OR seroincidence OR screening OR **exp epidemiology / OR exp surveys/ OR exp cohort analysis/ OR exp longitudinal studies/ OR exp followup studies/ OR exp prospective studies/**
13. 3 AND 11 AND 12
14. Limit 13: Animals/ NOT (Humans/ AND Animals/)
15. 13 NOT 14

### **Data extraction**

Data were extracted from included studies by JS using Microsoft Excel, and were checked by another author (HF), with any discrepancies being resolved by a third author (PV). Key characteristics extracted for each study included: study location, design and period; publication year; inclusion and exclusion criteria; recruitment methodology; methods used to assess incident HIV or HCV infection; mean/median duration of follow-up and rate of attrition; background HIV and HCV prevalence; proportion of study participants at baseline who were recent injectors, female, currently or recently homeless, and had recent or past incarceration; mean age and duration of injecting; population opiate substitution therapy (OST) coverage; number of incident infections and total follow-up time, both stratified by incarceration history (either recent or past); unadjusted and adjusted measures of effect with 95% confidence intervals.

**Appendix Table 1: List of studies excluded due to duplicate data.**

| Author (Year)                   | Location                             | Study Period | Cohort Name                   | Sample Size | Outcomes in Paper                                                     |   |
|---------------------------------|--------------------------------------|--------------|-------------------------------|-------------|-----------------------------------------------------------------------|---|
| Ahamad (2015) <sup>1</sup>      | Vancouver, Canada                    | 1996-2013    | VIDUS                         | 1,639       | Recent (last 6 months) incarceration on HIV acquisition risk          | 1 |
| Aitken (2008) <sup>2</sup>      | Melbourne, Australia                 | 2005-2007    | Networks 2                    | 105         | Past incarceration on HCV acquisition risk                            | 1 |
| Allen (2012) <sup>3</sup>       | Scotland                             | 2008-2009    | NESI                          | 1,367       | Past and recent incarceration (past 6 months) on HCV acquisition risk | 2 |
| Boileau (2005) <sup>4</sup>     | Montreal, Canada                     | 1992-2001    | St Luc Cohort                 | 1,602       | Recent (past 6 months) incarceration on HIV acquisition risk          | 1 |
| Bruneau (2012) <sup>5</sup>     | Montreal, Canada                     | 2004-2009    | St Luc/Hep-co                 | 246         | Recent (past 6 months) incarceration on HCV acquisition risk          | 1 |
| Craib (2003) <sup>6</sup>       | Vancouver, Canada                    | 1996-2001    | VIDUS                         | 941         | Recent (past 6 months) incarceration on HIV acquisition risk          | 1 |
| Cullen (2015) <sup>7</sup>      | England, Wales, and Northern Ireland | 2011         | UAM                           | 980         | Past incarceration on HCV acquisition risk                            | 1 |
| Hahn (2002) <sup>8</sup>        | San Francisco, USA                   | 2000-2001    | UFO                           | 195         | Recent incarceration (past 3 months) on HCV acquisition risk          | 1 |
| Hope (2011) <sup>9</sup>        | Bristol, England                     | 2006         |                               | 115         | Recent (past year) incarceration on HCV acquisition risk              | 1 |
| Hudgens (2002) <sup>10</sup>    | Bangkok, Thailand                    | 1995-1998    | BMA                           | 1,124       | Recent (since past visit) incarceration on HIV acquisition risk       | 1 |
| Kerr (2016) <sup>11</sup>       | Vancouver, Canada                    | 1996-2013    | VIDUS                         | 1,647       | Recent (past 6 months) incarceration on HIV acquisition risk          | 1 |
| Martin (2010) <sup>12</sup>     | Bangkok, Thailand                    | 1999-2003    | AIDSVAX B/E HIV vaccine trial | 2,546       | Recent (past 6 months) incarceration on HIV acquisition risk          | 1 |
| Montain (2016) <sup>13</sup>    | Vancouver, Canada                    | 1996-2013    | VIDUS                         | 1,639       | Recent (past 6 months) incarceration on HIV acquisition risk          | 1 |
| Morris (2017) <sup>14</sup>     | Melbourne, Australia                 | 2005-2011    | Networks 2                    | 119         | Past incarceration on HCV acquisition risk                            | 1 |
| Nelson (2002) <sup>15</sup>     | Baltimore, USA                       | 1988-1998    | ALIVE                         | 1,846       | Recent incarceration on HIV acquisition risk                          | 1 |
| Patrick (2001) <sup>16</sup>    | Vancouver, Canada                    | 1996-1999    | VIDUS                         | 155         | Recent (past 6 months) incarceration on HCV acquisition risk          | 1 |
| Spittal (2002) <sup>17</sup>    | Vancouver, Canada                    | 1996-2001    | VIDUS                         | 939         | Recent (past 6 months) incarceration on HIV acquisition risk          | 1 |
| Stone (2017) <sup>18</sup>      | Scotland                             | 2008-2013    | NESI                          | 1,717       | Recent (past 6 months) incarceration on HCV acquisition risk          | 1 |
| Strathdee (2001) <sup>19</sup>  | Baltimore, USA                       | 1988         | ALIVE                         | 1,874       | Recent (past 6 months) incarceration on HIV acquisition risk          | 1 |
| Tyndall (2003) <sup>20</sup>    | Vancouver, Canada                    | 1996-2000    | VIDUS                         | 940         | Recent (past 6 months) incarceration on HIV acquisition risk          | 1 |
| Vanichseni (2001) <sup>21</sup> | Bangkok, Thailand                    | 1995-1998    | BMA                           | 1,124       | Recent (since past visit) incarceration on HIV acquisition risk       | 1 |

**Appendix Table 2: Risk of bias of studies for the effect of recent incarceration on HIV acquisition risk. Average score: 6.6**

| Author and Year                  | Representativeness of the exposed cohort | Selection of the non-exposed cohort | Ascertainment of exposure | Demonstration that outcome of interest was not present at the start of the study | Comparability of cohorts on the basis of the design or analysis | Assessment of outcome | Was follow-up long enough for outcomes to occur | Adequacy of follow up of cohorts | Total (/9) |
|----------------------------------|------------------------------------------|-------------------------------------|---------------------------|----------------------------------------------------------------------------------|-----------------------------------------------------------------|-----------------------|-------------------------------------------------|----------------------------------|------------|
| Aladashvili (unpublished)        | -                                        | *                                   | *                         | *                                                                                | -                                                               | *                     | *                                               | *                                | 6          |
| Azim (unpublished)               | -                                        | *                                   | *                         | *                                                                                | -                                                               | *                     | *                                               | *                                | 6          |
| Bruneau (unpublished)            | *                                        | *                                   | *                         | *                                                                                | *                                                               | *                     | *                                               | *                                | 8          |
| Choopanya 2002 <sup>22</sup>     | -                                        | *                                   | *                         | *                                                                                | -                                                               | *                     | *                                               | *                                | 6          |
| Iversen (unpublished)            | -                                        | *                                   | *                         | *                                                                                | -                                                               | *                     | *                                               | -                                | 5          |
| Lucas 2015 <sup>23</sup>         | *                                        | *                                   | *                         | -                                                                                | -                                                               | *                     | -                                               | -                                | 4          |
| Martin 2014 <sup>24</sup>        | *                                        | *                                   | *                         | *                                                                                | *                                                               | *                     | *                                               | -                                | 7          |
| Mehta (unpublished)              | *                                        | *                                   | *                         | *                                                                                | **                                                              | *                     | *                                               | *                                | 9          |
| Milloy (unpublished - VIDUS)     | *                                        | *                                   | *                         | *                                                                                | **                                                              | *                     | *                                               | *                                | 9          |
| Roy (unpublished)                | -                                        | *                                   | *                         | *                                                                                | **                                                              | *                     | *                                               | *                                | 8          |
| Smyrnov (unpublished)            | *                                        | *                                   | *                         | -                                                                                | -                                                               | *                     | -                                               | -                                | 4          |
| Strathdee (unpublished – EC3)    | *                                        | *                                   | *                         | *                                                                                | -                                                               | *                     | *                                               | *                                | 7          |
| Strathdee (unpublished – EC4)    | *                                        | *                                   | *                         | *                                                                                | -                                                               | *                     | *                                               | *                                | 7          |
| Suntharasamai 2009 <sup>25</sup> | -                                        | *                                   | *                         | *                                                                                | *                                                               | *                     | *                                               | *                                | 7          |

**Appendix Table 3: Risk of bias of studies for the effect of past incarceration on HIV acquisition risk. Average score: 6.4**

| Author and Year              | Representativeness of the exposed cohort | Selection of the non-exposed cohort | Ascertainment of exposure | Demonstration that outcome of interest was not present at the start of the study | Comparability of cohorts on the basis of the design or analysis | Assessment of outcome | Was follow-up long enough for outcomes to occur | Adequacy of follow up of cohorts | Total (/9) |
|------------------------------|------------------------------------------|-------------------------------------|---------------------------|----------------------------------------------------------------------------------|-----------------------------------------------------------------|-----------------------|-------------------------------------------------|----------------------------------|------------|
| Aladashvili (unpublished)    | *                                        | *                                   | *                         | *                                                                                | -                                                               | *                     | *                                               | *                                | 7          |
| Azim (unpublished)           | -                                        | *                                   | *                         | *                                                                                | -                                                               | *                     | *                                               | *                                | 6          |
| Bruneau (unpublished)        | *                                        | *                                   | *                         | *                                                                                | *                                                               | *                     | *                                               | *                                | 8          |
| Choopanya 2002 <sup>22</sup> | *                                        | *                                   | *                         | *                                                                                | -                                                               | *                     | *                                               | *                                | 7          |
| Hu 2003 <sup>26</sup>        | -                                        | *                                   | *                         | -                                                                                | -                                                               | *                     | -                                               | -                                | 3          |
| Iversen (unpublished)        | -                                        | *                                   | *                         | *                                                                                | -                                                               | *                     | *                                               | -                                | 5          |

|                               |   |   |   |   |    |   |   |   |   |
|-------------------------------|---|---|---|---|----|---|---|---|---|
| Milloy (unpublished - VIDUS)  | * | * | * | * | ** | * | * | * | 9 |
| Smyrnov (unpublished)         | * | * | * | - | -  | * | - | - | 4 |
| Strathdee (unpublished – EC3) | * | * | * | * | -  | * | * | * | 7 |
| Strathdee (unpublished – EC4) | * | * | * | * | -  | * | * | * | 7 |
| Sypsa 2017 <sup>27</sup>      | * | * | * | * | ** | * | * | * | 9 |
| Yen (unpublished)             | - | * | * | * | -  | * | * | - | 5 |

**Appendix Table 4: Risk of bias of studies for the effect of recent incarceration on HCV acquisition risk. Average score: 6.6**

| Author and Year                       | Representativeness of the exposed cohort | Selection of the non-exposed cohort | Ascertainment of exposure | Demonstration that outcome of interest was not present at the start of the study | Comparability of cohorts on the basis of the design or analysis | Assessment of outcome | Was follow-up long enough for outcomes to occur | Adequacy of follow up of cohorts | Total (/9) |
|---------------------------------------|------------------------------------------|-------------------------------------|---------------------------|----------------------------------------------------------------------------------|-----------------------------------------------------------------|-----------------------|-------------------------------------------------|----------------------------------|------------|
| Aladashvili (unpublished)             | -                                        | *                                   | *                         | *                                                                                | -                                                               | *                     | *                                               | *                                | 6          |
| Azim (unpublished)                    | -                                        | *                                   | *                         | *                                                                                | -                                                               | *                     | *                                               | *                                | 6          |
| Bruneau 2015 <sup>28</sup>            | -                                        | *                                   | *                         | *                                                                                | *                                                               | *                     | *                                               | -                                | 6          |
| Brunton 2000 <sup>29</sup>            | -                                        | *                                   | *                         | *                                                                                | -                                                               | *                     | *                                               | *                                | 6          |
| Craine 2009 <sup>30</sup>             | *                                        | *                                   | *                         | *                                                                                | -                                                               | *                     | *                                               | *                                | 7          |
| Havens (unpublished)                  | *                                        | *                                   | *                         | *                                                                                | -                                                               | *                     | *                                               | *                                | 7          |
| Hutchinson (unpublished)              | -                                        | *                                   | *                         | -                                                                                | **                                                              | *                     | -                                               | -                                | 5          |
| Iversen 2013 <sup>31</sup>            | -                                        | *                                   | *                         | *                                                                                | *                                                               | *                     | *                                               | -                                | 6          |
| Maher (unpublished)                   | -                                        | *                                   | *                         | -                                                                                | *                                                               | *                     | -                                               | -                                | 4          |
| Mehta (unpublished)                   | *                                        | *                                   | *                         | *                                                                                | **                                                              | *                     | *                                               | *                                | 9          |
| Milloy (unpublished - VIDUS)          | *                                        | *                                   | *                         | *                                                                                | **                                                              | *                     | *                                               | *                                | 9          |
| Milloy (unpublished - ARYS)           | -                                        | *                                   | *                         | *                                                                                | **                                                              | *                     | *                                               | *                                | 8          |
| Platt, Hope and Hickman (unpublished) | *                                        | *                                   | *                         | -                                                                                | **                                                              | *                     | -                                               | -                                | 6          |
| Roy (unpublished)                     | -                                        | *                                   | *                         | *                                                                                | **                                                              | *                     | *                                               | *                                | 8          |
| Sacks-Davis 2016 <sup>32</sup>        | *                                        | *                                   | *                         | *                                                                                | *                                                               | *                     | *                                               | *                                | 8          |
| Smyth 2003 <sup>33</sup>              | -                                        | *                                   | *                         | *                                                                                | -                                                               | *                     | *                                               | -                                | 5          |
| Spittal 2012 <sup>34</sup>            | -                                        | *                                   | *                         | *                                                                                | -                                                               | *                     | *                                               | -                                | 5          |
| Tsui 2014 <sup>35</sup>               | -                                        | *                                   | *                         | *                                                                                | **                                                              | *                     | *                                               | *                                | 8          |



**Appendix Table 5: Risk of bias of studies for the effect of past incarceration on HCV acquisition risk. Average score: 6.2**

| Author and Year                       | Representativeness of the exposed cohort | Selection of the non-exposed cohort | Ascertainment of exposure | Demonstration that outcome of interest was not present at the start of the study | Comparability of cohorts on the basis of the design or analysis | Assessment of outcome | Was follow-up long enough for outcomes to occur | Adequacy of follow up of cohorts | Total (/9) |
|---------------------------------------|------------------------------------------|-------------------------------------|---------------------------|----------------------------------------------------------------------------------|-----------------------------------------------------------------|-----------------------|-------------------------------------------------|----------------------------------|------------|
| Aladashvili (unpublished)             | *                                        | *                                   | *                         | *                                                                                | -                                                               | *                     | *                                               | *                                | 7          |
| Azim (unpublished)                    | -                                        | *                                   | *                         | *                                                                                | -                                                               | *                     | *                                               | *                                | 6          |
| Blome 2011 <sup>36</sup>              | -                                        | *                                   | *                         | *                                                                                | *                                                               | *                     | -                                               | -                                | 5          |
| Dietze (unpublished) <sup>37</sup>    | -                                        | *                                   | *                         | *                                                                                | -                                                               | *                     | *                                               | *                                | 6          |
| Hagan 2010 <sup>38</sup>              | -                                        | *                                   | *                         | *                                                                                | -                                                               | *                     | *                                               | *                                | 6          |
| Havens (unpublished)                  | *                                        | *                                   | *                         | *                                                                                | -                                                               | *                     | *                                               | *                                | 7          |
| Hellard (unpublished)                 | -                                        | *                                   | *                         | *                                                                                | -                                                               | *                     | *                                               | *                                | 6          |
| Hope (unpublished, 2011-13)           | *                                        | *                                   | *                         | -                                                                                | **                                                              | *                     | -                                               | -                                | 6          |
| Hope (unpublished, 2014-15)           | *                                        | *                                   | *                         | -                                                                                | **                                                              | *                     | -                                               | -                                | 6          |
| Hutchinson (unpublished)              | -                                        | *                                   | *                         | -                                                                                | **                                                              | *                     | -                                               | -                                | 5          |
| Lucidarme 2004 <sup>39</sup>          | -                                        | *                                   | *                         | *                                                                                | -                                                               | *                     | *                                               | *                                | 6          |
| Micallef 2007 <sup>40</sup>           | -                                        | *                                   | *                         | *                                                                                | -                                                               | *                     | *                                               | -                                | 5          |
| Micallef 2007 <sup>40</sup>           | *                                        | *                                   | *                         | *                                                                                | -                                                               | *                     | *                                               | -                                | 6          |
| Milloy (unpublished - VIDUS)          | *                                        | *                                   | *                         | *                                                                                | **                                                              | *                     | *                                               | *                                | 9          |
| Milloy (unpublished - ARYS)           | -                                        | *                                   | *                         | *                                                                                | **                                                              | *                     | *                                               | *                                | 8          |
| Morris 2017 (UFO) <sup>14</sup>       | *                                        | *                                   | *                         | *                                                                                | -                                                               | *                     | *                                               | *                                | 7          |
| Morris 2017 (St Luc) <sup>14</sup>    | *                                        | *                                   | *                         | *                                                                                | -                                                               | *                     | *                                               | *                                | 7          |
| Morris 2017 (HITS-C/CU) <sup>14</sup> | *                                        | *                                   | *                         | *                                                                                | -                                                               | *                     | *                                               | *                                | 7          |
| Mravčik (unpublished)                 | *                                        | *                                   | *                         | *                                                                                | -                                                               | *                     | *                                               | -                                | 6          |
| Smyth 2003 <sup>33</sup>              | -                                        | *                                   | *                         | *                                                                                | -                                                               | *                     | *                                               | -                                | 5          |
| Spittal 2012 <sup>34</sup>            | -                                        | *                                   | *                         | *                                                                                | -                                                               | *                     | *                                               | -                                | 5          |
| Vallejo 2015 <sup>41</sup>            | -                                        | *                                   | *                         | *                                                                                | -                                                               | *                     | *                                               | -                                | 5          |

**Appendix Table 6: Characteristics of included studies for the effect of recent incarceration on HIV acquisition risk.**

| Author and Year                  | Cohort Name, recruitment site and methods, inclusion criteria                                                                                                                                                                                                                                                                                                                | Definition of recent incarceration | Effect Estimate                                                                                                                                                                                                                       |
|----------------------------------|------------------------------------------------------------------------------------------------------------------------------------------------------------------------------------------------------------------------------------------------------------------------------------------------------------------------------------------------------------------------------|------------------------------------|---------------------------------------------------------------------------------------------------------------------------------------------------------------------------------------------------------------------------------------|
| Aladashvili (unpublished)        | 1997-98: primarily out-of-treatment convenience sample of community PWID using advertising, participant referral and snowball sampling techniques. 2000-2001: referral of clinic patients. 1997-98: Injecting illicit drugs within the last six months, age: 18-65. 2000-2001: Age>18, history of IDU in the previous year.                                                  | Last 12 months                     | IRR: 2.6 (0.61-11.18)                                                                                                                                                                                                                 |
| Azim (unpublished)               | NSP clients. Male, Age>= 15, injected drugs at least once in the last 2 months, member of the NSP of CARE Bangladesh, not changed living area in the last 6 months.                                                                                                                                                                                                          | Last 6 months                      | IRR: 0.64 (0.15-2.75)<br>HR: 1.88 (1.34-2.65)<br>AHR: 1.34 (0.94-1.89)                                                                                                                                                                |
| Bruneau (unpublished)            | St Luc Cohort: Street-level recruitment or community programs. Age>=18, injected drugs within past 6 months.                                                                                                                                                                                                                                                                 | Last 6 months                      | Adjusted for: Age, gender, unstable housing, cocaine use in past month, heroin use in past month, sharing a syringe with a person known to be HIV +ve, booting, sex with someone known to be HIV +ve, period of recruitment.          |
| Choopanya 2002 <sup>22</sup>     | BMA: 15 Bangkok Metropolitan Administration drug treatment clinics. History of injection drug use, age: 18-50, attending any of 15 BMA drug treatment clinics, not known to be HIV-seropositive.                                                                                                                                                                             | Since last visit                   | IRR: 3.39 (2.35-4.9)                                                                                                                                                                                                                  |
| Iversen (unpublished)            | ANSPS: NSP sites, consenting NSP attendees.                                                                                                                                                                                                                                                                                                                                  | Last 12 months                     | HR: 2.16 (0.7-6.65)                                                                                                                                                                                                                   |
| Lucas 2015 <sup>23</sup>         | RDS. Age>=18, injecting drug use in the prior 2 years, verbal informed consent, presented valid recruitment coupon (except for seeds)                                                                                                                                                                                                                                        | Last 6 months                      | RR: 2.07 (0.94-4.57)                                                                                                                                                                                                                  |
| Martin 2014 <sup>24</sup>        | Bangkok Tenofovir Study: 17 drug-treatment clinics. HIV-negative individuals, age:20-60, injecting drugs during previous year. Excluded for hepatitis B virus surface antigen, pregnant or breastfeeding women.                                                                                                                                                              | Last 3 months                      | HR: 3.1 (1.7-5.6); AHR: 2.7 (1.4-4.9);<br>Adjusted for: age; injection frequency past 3 months; injected methamphetamine last 3 months; shared needles past 3 months; in police cell last 3 months.                                   |
| Mehta (unpublished)              | ALIVE: Community outreach. 1998-1999: non-medical injection-drug use within the preceding 11 years, age>18, free of AIDS. From 2005: no longer required to be AIDS-free at entry. 1994-1995: injected in past 3 years, 1998 and 2005-2008, injected in last year.                                                                                                            | Last 6 months                      | IRR: 1.07 (0.8-1.42); AIRR: 0.97 (0.72-1.31);<br>Adjusted for: intravenous cocaine use; intravenous heroin use; methadone treatment; homelessness                                                                                     |
| Milloy (unpublished)             | VIDUS: self-referral and street outreach from Vancouver's Downtown Eastside. Injected illicit drugs in the previous month, age>=18, resided in greater Vancouver.                                                                                                                                                                                                            | Last 6 months                      | HR: 1.8 (1.32-2.44); AHR: 1.76 (1.28-2.41);<br>Adjusted for: current enrolment in methadone program, homeless in last 6 months, any cocaine injection in last 6 months                                                                |
| Roy (unpublished)                | SurvUDI: NSP, drop-in centres, detention centres, detoxification clinics, and rehabilitation programmes, age>=14, injecting at least once within the past 6 months, speaking French or English, able to provide informed consent                                                                                                                                             | Last 6 months                      | HR: 1.76 (1.05-2.96); AHR: 1.77 (1.03-3.02);<br>Adjusted for: homelessness, OST exposure, using syringes used by someone else, cocaine most often injected drug, injecting drugs every day, age, gender, prostitution, urban sites    |
| Smyrnov (unpublished)            | Aids Alliance IBBA: RDS.                                                                                                                                                                                                                                                                                                                                                     | Last 6 months                      | OR: 1.91 (0.26-14.18)                                                                                                                                                                                                                 |
| Strathdee (unpublished)          | El Cuete III: RDS. Age>=18, injected illicit drugs within the past month (confirmed by inspection of injection stigmata), Spanish or English speaking; able to provide informed consent; no plans to permanently move out of the city in the next 18 months.                                                                                                                 | Last 6 months                      | IRR: 0.84 (0.05-13.96)                                                                                                                                                                                                                |
| Strathdee (unpublished)          | El Cuete IV: street-based outreach. Injecting illicit drugs in the past month (confirmed by visual assessment of 'track marks'), residing in Tijuana; speaking Spanish or English, age>=18.                                                                                                                                                                                  | Last 6 months                      | HR: 0.67 (0.28-1.6)                                                                                                                                                                                                                   |
| Suntharasamai 2009 <sup>25</sup> | AIDSVAX B/E HIV vaccine trial: 17 drug-treatment clinics, operated by the Bangkok Metropolitan Administration. Completion of informed consent, possession of a Thai national identification card, age: 20-60, availability for 3 years follow-up, injection drug use in the previous year, willingness to receive HIV counselling and testing, not known to be HIV positive. | Last 6 months                      | HR: 2.0 (1.4-2.7); AHR: 1.4 (1-1.9);<br>Adjusted for: Injection frequency during the 6 months before visit; sharing needles during the 6 months before visit; participated in methadone maintenance during the 6 months before visit. |

**Appendix Table 7: Characteristics of included studies for the effect of past incarceration on HIV acquisition risk.**

| Author and Year              | Cohort Name, recruitment site and methods, inclusion criteria                                                                                                                                                                                                                                                                | Exposure to past incarceration           | Effect Estimate                                                                                                                                                                                                                                                                                                                  |
|------------------------------|------------------------------------------------------------------------------------------------------------------------------------------------------------------------------------------------------------------------------------------------------------------------------------------------------------------------------|------------------------------------------|----------------------------------------------------------------------------------------------------------------------------------------------------------------------------------------------------------------------------------------------------------------------------------------------------------------------------------|
| Aladashvili (unpublished)    | 1997-98: primarily out-of-treatment convenience sample of community PWID using advertising, participant referral and snowball sampling techniques. 2000-2001: referral of clinic patients. 1997-98: injecting illicit drugs within the last six months, 18<=age<=65. 2000-2001: age>18, history of IDU in the previous year. | Baseline                                 | IRR: 0.38 (0.02-6.23)                                                                                                                                                                                                                                                                                                            |
| Azim (unpublished)           | NSP clients. Male, age>= 15, injected drugs at least once in the last 2 months, member of the NSEP of CARE Bangladesh, not changed living area in the last 6 months.                                                                                                                                                         | Measured at first follow-up              | IRR: 1.44 (0.42-4.94)                                                                                                                                                                                                                                                                                                            |
| Bruneau (unpublished)        | St Luc Cohort: Street-level recruitment or community programs. Age>=18, injected drugs within past 6 months.                                                                                                                                                                                                                 | Baseline                                 | HR: 1.57 (1.07-2.29)<br>AHR: 0.94 (0.63, 1.41)<br>Adjusted for: Age, gender, unstable housing, cocaine use in past month, heroin use in past month, sharing syringe with someone known to be HIV +ve, booting, sex with someone known to be HIV +ve, period of recruitment.                                                      |
| Choopanya 2002 <sup>22</sup> | BMA: 15 Bangkok Metropolitan Administration drug treatment clinics. History of injection drug use, age: 18-50, attending any of 15 BMA drug treatment clinics, not known to be HIV-seropositive.                                                                                                                             | Time varying measured at preceding visit | IRR: 1.7 (1.09-2.65)                                                                                                                                                                                                                                                                                                             |
| Hu 2003 <sup>26</sup>        | BMA: 15 Bangkok Metropolitan Administration drug treatment clinics. History of injection drug use, age: 18-50, attending any of 15 BMA drug treatment clinics, not known to be HIV-seropositive.                                                                                                                             | Baseline                                 | RR: 1.65 (1.09-2.51)                                                                                                                                                                                                                                                                                                             |
| Iversen (unpublished)        | ANSPS: NSP sites, consenting NSP attendees.                                                                                                                                                                                                                                                                                  | Baseline                                 | HR: 0.71 (0.24-2.12)                                                                                                                                                                                                                                                                                                             |
| Milloy (unpublished)         | VIDUS: self-referral and street outreach from Vancouver's Downtown Eastside. Injected illicit drugs in the previous month, age>=18, resided in greater Vancouver.                                                                                                                                                            | Baseline                                 | HR: 0.82 (0.58-1.15);<br>AHR: 0.86 (0.61-1.21)<br>Adjusted for: current enrolment in methadone program; homeless in last 6 months; any cocaine injection in last 6 months                                                                                                                                                        |
| Smyrnov (unpublished)        | Aids Alliance IBBA: RDS.                                                                                                                                                                                                                                                                                                     | Baseline                                 | OR: 1.65 (0.76-3.59)                                                                                                                                                                                                                                                                                                             |
| Strathdee (unpublished)      | El Cuete III: RDS. Age>=18, injected illicit drugs within the past month (confirmed by inspection of injection stigmata), Spanish or English speaking; able to provide informed consent; no plans to permanently move out of the city in the next 18 months.                                                                 | Baseline                                 | HR: 0.67 (0.25-1.85)                                                                                                                                                                                                                                                                                                             |
| Strathdee (unpublished)      | El Cuete IV: street-based outreach. Injecting illicit drugs in the past month (confirmed by visual assessment of 'track marks'), residing in Tijuana; speaking Spanish or English, age>=18.                                                                                                                                  | Baseline                                 | HR: 0.56 (0.25-1.26)                                                                                                                                                                                                                                                                                                             |
| Sypsa 2017 <sup>27</sup>     | ARISTOTLE: RDS. Seeds were recruited by staff of the Greek Organization Against Drugs. Valid RDS coupon, injected drugs without prescription in the past 12 months, age ≥18, resided in the Athens metropolitan area and had not participated previously in the current sampling round.                                      | Time varying                             | HR: 2.4 (1.27-4.53)<br>AHR: 1.99 (0.98-3.85).<br>Adjusted for: age, sex; country of origin, currently homeless; size of participants network; currently in an OST program; main substance of use; injecting drug use in past month; frequency of injecting drug use; sharing syringes; use of drugs divided with a used syringe. |

| Author and Year   | Cohort Name, recruitment site and methods, inclusion criteria                                                   | Exposure to past incarceration | Effect Estimate       |
|-------------------|-----------------------------------------------------------------------------------------------------------------|--------------------------------|-----------------------|
| Yen (unpublished) | MMT program at Taipei City Hospital. History of injecting drug use prior to enrolling in methadone maintenance. | Baseline                       | IRR: 0.74 (0.04-14.4) |

**Appendix Table 8: Characteristics of included studies for the effect of recent incarceration on HCV acquisition risk. All studies, except those marked with an asterisk, measured the effect on primary HCV infection. Those marked with an asterisk measured the effect on HCV reinfection.**

| Author and Year                   | Cohort Name, recruitment site and methods, inclusion criteria                                                                                                                                                                                                                                                              | Definition of recent incarceration | Effect Estimate                                                                                                                                                                                                                                                               |
|-----------------------------------|----------------------------------------------------------------------------------------------------------------------------------------------------------------------------------------------------------------------------------------------------------------------------------------------------------------------------|------------------------------------|-------------------------------------------------------------------------------------------------------------------------------------------------------------------------------------------------------------------------------------------------------------------------------|
| Aladashvili (unpublished)         | 1997-98: primarily out-of-treatment convenience sample of community PWID using advertising, participant referral and snowball sampling techniques. 2000-2001: referral of clinic patients, 1997-98: injecting illicit drugs within the last six months, age:18-65. 2000-2001: age>18, history of IDU in the previous year. | Last 12 months                     | IRR: 1.56 (0.57-4.23)                                                                                                                                                                                                                                                         |
| Azim (unpublished)                | NSP clients. Male, age≥ 15, injected drugs at least once in the last 2 months, member of the NSEP of CARE Bangladesh, not changed living area in the last 6 months.                                                                                                                                                        | Last 6 months                      | IRR: 1.36 (0.6-3.09)                                                                                                                                                                                                                                                          |
| Bruneau 2015 * 28                 | HEPCO: Community based outreach. Injected drugs in last 6 months, age≥18, reside on the Island of Montréal.                                                                                                                                                                                                                | Last 3 months                      | Adjusted for: method of HCV initial clearance; age; gender; cocaine injection past month; heroin injection past month; prescription opioid injection past month; sharing syringes or injection paraphernalia past 6 months<br>IRR: 2.75 (0.34-21.99)<br>IRR: 1.36 (0.48-3.85) |
| Brunton 2000 29<br>Craine 2009 30 | Community, NSP and drug treatment. Snowball. Injected in last 12 months. Treatment services, NSP, homeless hostels, street. Current or recent drug injector.                                                                                                                                                               | Since last visit<br>Last 12 months | RR: 2.02 (0.89-4.61);<br>ARR: 1.21 (0.51-2.84)                                                                                                                                                                                                                                |
| Havens (unpublished)              | SNAP: RDS. Seeds had a lifetime history of injection drug use and recruited their drug-using peers. Age≥18, resided in Appalachian Kentucky, used prescription opioids, cocaine, heroin, or methamphetamine to get high in prior 30 days. Data analysis excludes never injectors at baseline.                              | Last 6 months                      | Adjusted for: homeless in last 6 months; currently on methadone; injected crack or cocaine in last 6 months<br>HR: 2.84 (2.01-4.02);<br>AHR: 2.68 (1.88-3.83)                                                                                                                 |
| Hutchinson (unpublished)          | NESI: sites providing sterile injecting equipment across mainland Scotland. Ever injected drugs.                                                                                                                                                                                                                           | Last 6 months                      | RR: 2.31 (0.86-6.21);<br>ARR: 2.15 (0.74-5.22)                                                                                                                                                                                                                                |
| Iversen 2013 31                   | ANSPS: NSP sites, Consenting NSP attendees. Participated in the ANSPS in consecutive years and those with only a 1-year gap between participation records.                                                                                                                                                                 | Last 12 months                     | Adjusted for: last drug injected; daily injection; location; study period.                                                                                                                                                                                                    |
| Maher (unpublished)               | ANSPS: NSP Sites, consenting NSP attendees.                                                                                                                                                                                                                                                                                | Last 12 months                     | Adjusted for: exposure to OST/MMT; duration of injecting; use of crack<br>IRR: 1.6 (0.55-4.68);<br>AIRR: 2.39 (0.78-7.3)                                                                                                                                                      |
| Mehta (unpublished)               | ALIVE: Community outreach. 1998-1999: non-medical injection-drug use within the preceding 11 years, age>18, free of AIDS. From 2005 no longer required to be AIDS-free at entry. 1994-1995, injected in past 3 years, 1998 and 2005-2008, injected in last year.                                                           | Last 6 months                      | Adjusted for: intravenous cocaine use; intravenous heroin use; methadone treatment; homeless                                                                                                                                                                                  |
| Milloy (unpublished)              | ARYS: Snowball sampling and extensive street-based outreach. Age:14-26, use of drugs other than marijuana in the past 30 days. For analyses: first record where a participant reported injection in the last 6 months was set as baseline.                                                                                 | Last 6 months                      | HR: 2.61 (1.69-4.04);<br>AHR: 2.46 (1.56-3.86)                                                                                                                                                                                                                                |

| Author and Year                       | Cohort Name, recruitment site and methods, inclusion criteria                                                                                                                                                                                                                        | Definition of recent incarceration | Effect Estimate                                                                                                                                                                                                                      |
|---------------------------------------|--------------------------------------------------------------------------------------------------------------------------------------------------------------------------------------------------------------------------------------------------------------------------------------|------------------------------------|--------------------------------------------------------------------------------------------------------------------------------------------------------------------------------------------------------------------------------------|
| Milloy (unpublished)                  | VIDUS: self-referral and street outreach from Vancouver's Downtown Eastside. Injected illicit drugs in the previous month, age $\geq$ 18, resided in greater Vancouver.                                                                                                              | Last 6 months                      | Adjusted for: current enrolment in methadone program, homeless in last 6 months, any cocaine injection in last 6 months<br>HR: 1.16 (0.81-1.68);<br>AHR: 1.12 (0.77-1.61)                                                            |
| Platt, Hope and Hickman (unpublished) | RDS, injected last 4 weeks                                                                                                                                                                                                                                                           | Last 12 months                     | Adjusted for: current enrolment in methadone program, homeless in last 6 months, any cocaine injection in last 6 months<br>RR: 1.22 (0.48-3.09);<br>ARR: 1.21 (0.44-3.16)                                                            |
| Roy (unpublished)                     | SurvUDI: NSP, drop-in centres, detention centres, detoxification clinics, and rehabilitation programmes, age $\geq$ 14, injecting at least once within the past 6 months, speaking French or English, able to provide informed consent                                               | Last 6 months                      | Adjusted for: exposure to OST, homeless in last 12 months, duration of injecting; use of Crack<br>HR: 1.08 (0.78-1.49);<br>AHR: 0.93 (0.67-1.29)                                                                                     |
| Sacks-Davis 2016 <sup>32</sup>        | HEPCO: Community based outreach. Injected drugs in last 6 months, age $\geq$ 18, reside on the Island of Montreal. For data analysis, interviews excluded if invalid postal code or postal code associated with residence outside the Island of Montreal or a correctional facility. | Last 3 months                      | Adjusted for: homelessness, OST exposure, using syringes used by someone else, cocaine most often injected drug, injecting drugs every day, age, gender, prostitution, urban sites<br>HR: 2.38 (1.43-3.95);<br>AHR: 1.98 (1.18-3.32) |
| Smyth 2003 <sup>33</sup>              | Trinity Court drug treatment centre. History of injecting                                                                                                                                                                                                                            | Since last visit                   | Adjusted for: recent cocaine injection; recently injected at least daily; prescription opioid injection by area of residence.<br>IRR: 0.79 (0.42-1.48)                                                                               |
| Spittal 2012 <sup>34</sup>            | Cedar Project: Referral by health care providers, community outreach and word of mouth. Age: 14-30 years of age, smoked illicit drugs in the last week or injected illicit drugs in the last month.                                                                                  | Last 6 months                      | HR: 1.25 (0.83-1.89)                                                                                                                                                                                                                 |
| Tsui 2014 <sup>35</sup>               | UFO: Recruitment by outreach and word of mouth. Age $\leq$ 30, injecting drugs in the prior month, English as primary language, and if recruited in 2003 or later, did not plan to travel outside of San Francisco within the next 3 months.                                         | Last 3 months                      | AHR: 1.58 (1.12-2.23)<br>Adjusted for: drug treatment past 3 months; age; duration injecting; gender; ethnicity; homeless past 3 months                                                                                              |

**Appendix Table 9: Characteristics of included studies for the effect of past incarceration on HCV acquisition risk. All studies, except those marked with an asterisk or dagger, measured the effect on primary HCV infection. Those marked with an asterisk measured the effect on HCV reinfection; those marked with a dagger measure the effect on primary HCV infection and HCV reinfection.**

| Author and Year                   | Cohort Name, recruitment site and methods, inclusion criteria                                                                                                                                                                                                                                                                                                                                                                                                                                                                                                                                                                                                                                                                                                                                                                                                                                                                  | Exposure to past incarceration | Effect Estimate                                                                                                                                                       |
|-----------------------------------|--------------------------------------------------------------------------------------------------------------------------------------------------------------------------------------------------------------------------------------------------------------------------------------------------------------------------------------------------------------------------------------------------------------------------------------------------------------------------------------------------------------------------------------------------------------------------------------------------------------------------------------------------------------------------------------------------------------------------------------------------------------------------------------------------------------------------------------------------------------------------------------------------------------------------------|--------------------------------|-----------------------------------------------------------------------------------------------------------------------------------------------------------------------|
| Aladashvili (unpublished)         | 1997-98: primarily out-of-treatment convenience sample of community PWID using advertising, participant referral and snowball sampling techniques. 2000-2001: referral of clinic patients. 1997-98: Injecting illicit drugs within the last six months, age:18-65. 2000-2001: age>18, history of IDU in the previous year.                                                                                                                                                                                                                                                                                                                                                                                                                                                                                                                                                                                                     | Baseline                       | IRR: 0.5 (0.12-2.01)                                                                                                                                                  |
| Azim (unpublished)                | NSP. Male, age>= 15, injected drugs at least once in the last 2 months, member of the NSEP of CARE Bangladesh, not changed living area in the last 6 months.                                                                                                                                                                                                                                                                                                                                                                                                                                                                                                                                                                                                                                                                                                                                                                   | Measured at first follow-up    | IRR: 2.04 (0.9-4.65)                                                                                                                                                  |
| Blome 2011 <sup>36</sup>          | New NSP participants, self-reported injection drug use, age>=20, signs of recent venepuncture and consent to HIV testing.                                                                                                                                                                                                                                                                                                                                                                                                                                                                                                                                                                                                                                                                                                                                                                                                      | Baseline                       | RR: 1.27 (1.05-1.53);<br>ARR: 1.3 (1.06-1.49);<br>Adjusted for: intravenous heroin and amphetamine use; duration of intravenous use of amphetamines.                  |
| Dietze (unpublished) <sup>†</sup> | Melbourne Injecting Drug Users Cohort Study (MIX): recruited in Urban Melbourne through respondent-driven sampling (RDS), street outreach and snowball sampling. Age >=18 years; injected either heroin or methamphetamine at least six times over the previous six months; currently residing in Melbourne; willing to provide detailed contact information; able and willing to provide a valid Medicare card number. Two further eligibility criteria that aimed to recruit participants who were young (aged <31 years) and not prescribed OST were withdrawn during early recruitment. DUIT: Street outreach, advertising, and coupon-based participant referrals. Injected illicit drugs in past 6 months, reside in recruitment city with no plans to move within 12 months, English-speaking, age:15-30, seronegative for HIV and HCV antibody. Data analysis excludes those not injecting during the follow-up period | Baseline                       | IRR: 0.73 (0.47-1.13)                                                                                                                                                 |
| Hagan 2010 <sup>38</sup>          |                                                                                                                                                                                                                                                                                                                                                                                                                                                                                                                                                                                                                                                                                                                                                                                                                                                                                                                                | Baseline                       | IRR: 1.51 (0.81-2.8)                                                                                                                                                  |
| Havens (unpublished)              | SNAP: RDS. Seeds had a lifetime history of injection drug use and recruited their drug-using peers. Age>=18, resided in Appalachian Kentucky, used prescription opioids, cocaine, heroin, or methamphetamine to get high in the prior 30 days. Data analysis excludes never injectors at baseline.                                                                                                                                                                                                                                                                                                                                                                                                                                                                                                                                                                                                                             | Baseline                       | IRR: 1.12 (0.65-1.92)                                                                                                                                                 |
| Hellard (unpublished)             | NETWORKS2: 3 major street drug markets across metropolitan Melbourne. Social networks approach. Injected in the previous six months                                                                                                                                                                                                                                                                                                                                                                                                                                                                                                                                                                                                                                                                                                                                                                                            | Baseline                       | HR: 0.52 (0.14-1.97)                                                                                                                                                  |
| Hope (unpublished)                | UAM 2011-13: specialist drug services. Ever injected.                                                                                                                                                                                                                                                                                                                                                                                                                                                                                                                                                                                                                                                                                                                                                                                                                                                                          | Baseline                       | OR: 1.16 (0.82-1.63);<br>AOR: 1.06 (0.75-1.51); Adjusted for: injected crack last 4 weeks; homeless in the last year; currently prescribed treatment for drug use.    |
| Hope (unpublished)                | UAM 2014-15: specialist drug services. Ever injected.                                                                                                                                                                                                                                                                                                                                                                                                                                                                                                                                                                                                                                                                                                                                                                                                                                                                          | Baseline                       | OR: 1.74 (0.93-3.25);<br>AOR: 1.60 (0.85-3.03);<br>Adjusted for: injected crack last 4 weeks; homeless in the last year; currently prescribed treatment for drug use. |
| Hutchinson (unpublished)          | NESI: sites providing sterile injecting equipment across mainland Scotland. Ever injected drugs.                                                                                                                                                                                                                                                                                                                                                                                                                                                                                                                                                                                                                                                                                                                                                                                                                               | Baseline                       | RR: 1.44 (0.73-2.84);<br>ARR: 1.22 (0.61-2.44);<br>Adjusted for: homeless in last 6 months; currently on methadone; injected crack or cocaine in last 6 months        |
| Lucidarme 2004 <sup>39</sup>      | 6 care centres in Northern and Eastern France, injected drugs at least once in their lifetime, HCV serology presumed to be negative.                                                                                                                                                                                                                                                                                                                                                                                                                                                                                                                                                                                                                                                                                                                                                                                           | Baseline                       | IRR: 1.91 (0.71-5.13)                                                                                                                                                 |
| Micallef 2007 <sup>40</sup>       | Kirketon Road Centre primary health care facility. Anti-HCV antibody negative IDUs on initial testing from July 1993 who underwent repeat anti-HCV antibody testing prior to March 2002.                                                                                                                                                                                                                                                                                                                                                                                                                                                                                                                                                                                                                                                                                                                                       | Baseline                       | IRR: 2.48 (1.72-3.59)                                                                                                                                                 |

| Author and Year            | Cohort Name, recruitment site and methods, inclusion criteria                                                                                                                                                                                                                                                                              | Exposure to past incarceration           | Effect Estimate                                                                                                                                                            |
|----------------------------|--------------------------------------------------------------------------------------------------------------------------------------------------------------------------------------------------------------------------------------------------------------------------------------------------------------------------------------------|------------------------------------------|----------------------------------------------------------------------------------------------------------------------------------------------------------------------------|
| Micallef 2007*<br>40       | Kirketon Road Centre. Subjects from the HCV seronegative cohort who seroconverted to anti-HCV antibody positive within 2 years of their most recent anti-HCV antibody negative result.                                                                                                                                                     | Baseline                                 | IRR: 1.56 (0.43-5.65)                                                                                                                                                      |
| Milloy (unpublished)       | ARYS: Snowball sampling and extensive street-based outreach. Age:14-26, use of drugs other than marijuana in the past 30 days. For analyses: first record where a participant reported injection in the last 6 months was set as baseline.                                                                                                 | Baseline                                 | HR: 1.24 (0.77-2.01);<br>AHR: 1.28 (0.77-2.13);<br>Adjusted for: current enrolment in methadone program, homeless in last 6 months, any cocaine injection in last 6 months |
| Milloy (unpublished)       | VIDUS: self-referral and street outreach from Vancouver's Downtown Eastside. Injected illicit drugs in the previous month, age>=18, resided in greater Vancouver.                                                                                                                                                                          | Baseline                                 | HR: 0.75 (0.54-1.05);<br>AHR: 0.7 (0.5-0.98);<br>Adjusted for: current enrolment in methadone program, homeless in last 6 months, any cocaine injection in last 6 months"  |
| Morris 2017 <sup>14</sup>  | HITS-C & CU: Community-based outreach; open enrolment. Injection drug use within past 12 months, age>=16, anti-HCV negative.                                                                                                                                                                                                               | Baseline                                 | IRR: 0.33 (0.09-1.14)                                                                                                                                                      |
| Morris 2017 <sup>14</sup>  | St Luc (HEPCO): Community-based outreach; open enrolment, Injection drug use in past 6 months, age≥14, anti-HCV negative.                                                                                                                                                                                                                  | Baseline                                 | IRR: 1.16 (0.68-1.96)                                                                                                                                                      |
| Morris 2017 <sup>14</sup>  | UFO: outreach word of mouth. Injection drug use in past month; age<30; anti-HCV negative.                                                                                                                                                                                                                                                  | Baseline                                 | IRR: 1.11 (0.68-1.83)                                                                                                                                                      |
| Mravčik (unpublished)      | Clients of the low-threshold facilities were used as seeds for snowball sampling. Injection drug use in the last 12 months, age>=15. Excluded for previous participation in study, and/or current participation in an abstinence-oriented or substitution treatment program, and/or an inability to understand the questions/instructions. | Baseline                                 | IRR: 0.81 (0.26-2.5)                                                                                                                                                       |
| Smyth 2003 <sup>33</sup>   | Trinity Court drug treatment centre. History of injecting                                                                                                                                                                                                                                                                                  | Baseline                                 | IRR: 1.73 (1.03-2.89)                                                                                                                                                      |
| Spittal 2012 <sup>34</sup> | Cedar Project: Referral by health care providers, community outreach and word of mouth. Age: 14-30 years of age, smoked illicit drugs in the last week or injected illicit drugs in the last month, including crystal methamphetamine, crack-cocaine, heroin, or cocaine prior to enrolment.                                               | Time varying                             | HR: 1.11 (0.59-2.09)                                                                                                                                                       |
| Vallejo 2015 <sup>41</sup> | Heroin-Itinere cohort: Street recruitment, targeted sampling, and chain-referral. Age<=30, heroin use at least 12 days in the past 12 months and at least 1 day in the past 3 months.                                                                                                                                                      | Measured during last period of follow up | IRR: 1.2 (0.57-2.5)                                                                                                                                                        |

**Appendix Table 10: Characteristics of all included studies.** N/A = not available.

|                                            | Mean/median follow-up (years) | % female | Baseline prevalence |       | Incidence (/100 py) |      |
|--------------------------------------------|-------------------------------|----------|---------------------|-------|---------------------|------|
|                                            |                               |          | HCV                 | HIV   | HCV                 | HIV  |
| Aladashvili (unpublished)                  | 1.8                           | 0.3      | 59.3                | 0.7   | 14.9                | 1.2  |
| Azim (unpublished)                         | 3.6                           | 0        | 66.8                | 5.9   | 7.8                 | 1.1  |
| Blome 2011 <sup>36</sup>                   | 1.5                           | 21.4     | 60                  | 0     | 38.3                | N/A  |
| Bruneau (unpublished)                      | 2.1                           | 19.5     | N/A                 | 10.5  | N/A                 | 3.3  |
| Bruneau 2015 <sup>28</sup>                 | 3                             | 24       | N/A                 | N/A   | 4.8                 | N/A  |
| Brunton 2000 <sup>29</sup>                 | 2                             | 40.9     | 64                  | N/A   | 13                  | N/A  |
| Choopanya 2002 <sup>22</sup>               | 2.4                           | 6.5      | N/A                 | 29.9  | N/A                 | 5.8  |
| Craine 2009 <sup>30</sup>                  | 1                             | 29.02    | 26.3                | N/A   | 5.9                 | N/A  |
| Dietze (unpublished)                       | 3.4                           | 32.6     | 45.8                | 0.2   | 9.0                 | N/A  |
| Hagan 2010 <sup>38</sup>                   | 0.67                          | 32.9     | 34.4                | N/A   | 17.3                | N/A  |
| Havens (unpublished)                       | 4.7                           | 44       | 53.3                | N/A   | 12.6                | N/A  |
| Hellard (unpublished)                      | 1                             | 34.5     | 61.3                | N/A   | 13.0                | N/A  |
| Hope (unpublished - UAM 2011-13)           | Cross-sectional study         | 25.46    | 48.4                | N/A   | 12.3                | N/A  |
| Hope (unpublished - UAM 2014-15)           | Cross-sectional study         | 25.31    | 52.7                | N/A   | 7.8                 | N/A  |
| Hu 2003 <sup>26</sup>                      | Cross-sectional study         | 8.3      | N/A                 | 30.2  | N/A                 | 17.3 |
| Hutchinson (unpublished)                   | Cross-sectional study         | N/A      | 53.4                | N/A   | 10.1                | N/A  |
| Iversen (unpublished)                      | N/A                           | N/A      | N/A                 | 0.95  | N/A                 | 0.1  |
| Iversen 2013 <sup>31</sup>                 | 1.5                           | 37.4     | 53.6                | N/A   | 17                  | N/A  |
| Lucas 2015 <sup>23</sup>                   | Cross-sectional study         | 7.2      | N/A                 | 18.1  | N/A                 | 2.9  |
| Lucidarme 2004 <sup>39</sup>               | N/A                           | 17.6     | 21.4                | N/A   | 9                   | N/A  |
| Maher (unpublished)                        | Cross-sectional study         | 31.5     | 53                  | N/A   | 42                  | N/A  |
| Martin 2014 <sup>24</sup>                  | 4                             | 20.3     | N/A                 | 11    | N/A                 | 0.6  |
| Mehta (unpublished)                        | 6.6                           | 24.1     | N/A                 | 21.4  | 17                  | 2.1  |
| Micallef 2007 (primary) <sup>40</sup>      | 1                             | 59.8     | N/A                 | N/A   | 17                  | N/A  |
| Micallef 2007 (re-infection) <sup>40</sup> | 1.2                           | 55.6     | N/A                 | N/A   | 42                  | N/A  |
| Milloy (unpublished - VIDUS)               | 6.3                           | 34.49    | 82                  | 30.3  | N/A                 | N/A  |
| Milloy (unpublished - ARYS)                | N/A                           | 33       | 18.6                | 0.5   | N/A                 | N/A  |
| Morris 2017 (Sydney) <sup>14</sup>         | N/A                           | 32       | N/A                 | N/A   | 21.4                | N/A  |
| Morris 2017 (San Francisco) <sup>14</sup>  | N/A                           | 19       | N/A                 | N/A   | 23.5                | N/A  |
| Morris 2017 (Montreal) <sup>14</sup>       | N/A                           | 33       | N/A                 | N/A   | 24.7                | N/A  |
| Mravčik (unpublished)                      | 0.81                          | 39.5     | 29.7                | N/A   | 11.9                | N/A  |
| Platt, Hope and Hickman (unpublished)      | Cross-sectional study         | 20.21    | 55.3                | N/A   | 24.2                | N/A  |
| Roy (unpublished)                          | 3.6                           | 24.7     | 60.4                | 11.9  | 22.5                | 1.4  |
| Sacks-Davis 2016 <sup>32</sup>             | 2.77                          | 18       | 68.5                | N/A   | 16.2                | N/A  |
| Smyrnov (unpublished)                      | Cross-sectional study         | 23.6     | N/A                 | 17.89 | N/A                 | 0.7  |
| Smyth 2003 <sup>33</sup>                   | 1                             | 34       | N/A                 | N/A   | 66                  | N/A  |
|                                            | Mean/median follow-up (years) | % female | Baseline prevalence |       | Incidence (/100 py) |      |
|                                            |                               |          | HCV                 | HIV   | HCV                 | HIV  |
| Spittal 2012 <sup>34</sup>                 | 2.6                           | 53.4     | 46.4                | N/A   | 11.6                | N/A  |
| Strathdee (unpublished - EC3)              | 2.1                           | 13.16    | N/A                 | 4.46  | N/A                 | 0.8  |
| Strathdee (unpublished - EC4)              | 3.7                           | 38.1     | N/A                 | 3.54  | N/A                 | 0.9  |



|                                  |     |       |      |      |      |     |
|----------------------------------|-----|-------|------|------|------|-----|
| Suntharasamai 2009 <sup>25</sup> | 2.7 | 6.6   | N/A  | 34.2 | N/A  | 3.4 |
| Sypsa 2017 <sup>27</sup>         | 0.7 | 15.45 | N/A  | 15.1 | N/A  | 4.5 |
| Tsui 2014 <sup>35</sup>          | N/A | 31.9  | 39.2 | 4.4  | 25.1 | N/A |
| Vallejo 2015 <sup>41</sup>       | 2.2 | 26.32 | 73.3 | 26.3 | 39.8 | N/A |
| Yen (unpublished)                | 1.1 | 8.9   | N/A  | 13.4 | N/A  | 1.1 |

**Appendix Table 11: Sensitivity analyses for the meta-analysis results. Pooled estimates of the crude and adjusted effect estimates shown for comparison.**

|                                                     | Number of studies | Effect size (95% CI) | P-value | I <sup>2</sup> | P-value for heterogeneity |
|-----------------------------------------------------|-------------------|----------------------|---------|----------------|---------------------------|
| <b>Recent incarceration on HIV acquisition risk</b> |                   |                      |         |                |                           |
| Crude effect estimates                              | 14                | 1.81 (1.40-2.34)     | <0.001  | 63.5           | 0.001                     |
| Adjusted effect estimates                           | 6                 | 1.48 (1.16-1.90)     | 0.002   | 60.9           | 0.025                     |
| Published estimates only                            | 4                 | 2.59 (1.91-3.52)     | <0.001  | 41.1           | 0.165                     |
| Unpublished estimates only                          | 10                | 1.47 (1.14-1.90)     | 0.003   | 38.5           | 0.101                     |
| Only studies with low/medium risk of bias           | 8                 | 1.65 (1.26-2.16)     | 0.006   | 64.7           | 0.006                     |
| Only longitudinal studies                           | 12                | 1.79 (1.36-2.36)     | <0.001  | 69.0           | <0.001                    |
| Only hazard ratios                                  | 7                 | 1.87 (1.52-2.31)     | <0.001  | 29.0           | 0.207                     |
| Excluding studies with zero cases                   | 13                | 1.82 (1.41-2.36)     | <0.001  | 66.1           | <0.001                    |
| Only studies with >90% injecting in last 6 months   | 7                 | 1.72 (1.40-2.13)     | <0.001  | 21.2           | 0.268                     |
| <b>Past incarceration on HIV acquisition risk</b>   |                   |                      |         |                |                           |
| Crude effect estimates                              | 12                | 1.25 (0.94-1.65)     | 0.112   | 49.8           | 0.025                     |
| Adjusted effect estimates                           | 3                 | 1.06 (0.71-1.56)     | 0.785   | 55.0           | 0.108                     |
| Published estimates only                            | 3                 | 1.76 (1.34-2.32)     | <0.001  | 0.0            | 0.553                     |
| Unpublished estimates only                          | 9                 | 1.00 (0.73-1.38)     | 0.980   | 33.0           | 0.154                     |
| Only studies with low/medium risk of bias           | 6                 | 1.06 (0.66-1.71)     | 0.802   | 69.0           | 0.007                     |
| Only longitudinal studies                           | 10                | 1.15 (0.81-1.62)     | 0.436   | 55.1           | 0.018                     |
| Only hazard ratios                                  | 6                 | 1.05 (0.67-1.64)     | 0.842   | 69.1           | 0.006                     |
| Excluding studies with zero cases                   | 10                | 1.27 (0.95-1.70)     | 0.110   | 58.2           | 0.010                     |
| Only studies with >90% injecting in last 6 months   | 5                 | 0.96 (0.63-1.48)     | 0.864   | 58.2           | 0.048                     |
| <b>Recent incarceration on HCV acquisition risk</b> |                   |                      |         |                |                           |
| Crude effect estimates                              | 17                | 1.62 (1.28-2.05)     | <0.001  | 57.3           | 0.002                     |
| Adjusted effect estimates                           | 11                | 1.60 (1.21-2.11)     | 0.001   | 64.7           | 0.002                     |
| Published estimates only                            | 7                 | 1.58 (1.02-2.45)     | 0.041   | 68.4           | 0.004                     |
| Unpublished estimates only                          | 10                | 1.61 (1.22-2.12)     | 0.001   | 45.6           | 0.057                     |
| Only studies with low/medium risk of bias           | 7                 | 1.70 (1.20-2.43)     | 0.003   | 67.0           | 0.006                     |
| Only longitudinal studies                           | 14                | 1.59 (1.22-2.08)     | 0.001   | 64.2           | 0.001                     |
| Only hazard ratios                                  | 7                 | 1.65 (1.15-2.37)     | 0.006   | 79.1           | <0.001                    |
| Only studies with >90% injecting in last 6 months   | 7                 | 1.55 (1.11-2.15)     | 0.009   | 61.4           | 0.016                     |
| <b>Past incarceration on HCV acquisition risk</b>   |                   |                      |         |                |                           |
| Crude effect estimates                              | 22                | 1.21 (1.02-1.43)     | 0.027   | 50.6           | 0.004                     |
| Adjusted effect estimates                           | 6                 | 1.12 (0.88-1.42)     | 0.366   | 57.5           | 0.038                     |
| Published estimates only                            | 11                | 1.39 (1.11-1.74)     | 0.004   | 46.3           | 0.046                     |
| Unpublished estimates only                          | 10                | 1.05 (0.84-1.30)     | 0.680   | 35.5           | 0.115                     |
| Only studies with low/medium risk of bias           | 7                 | 0.96 (0.75-1.22)     | 0.724   | 25.2           | 0.236                     |
| Only longitudinal studies                           | 18                | 1.18 (0.97-1.44)     | 0.102   | 56.0           | 0.002                     |
| Only hazard ratios                                  | 4                 | 0.92 (0.68-1.25)     | 0.595   | 24.1           | 0.267                     |
| Only studies with >90% injecting in last 6 months   | 8                 | 1.03 (0.80-1.32)     | 0.824   | 39.6           | 0.115                     |

**Appendix Table 12: Uni-variable meta-regression for the effect of recent incarceration on the risk of HIV acquisition.**

|                                            | Number of studies | Effect size (95% CI) | Ratio (95% CI)    | $\tau^2$ | Adjusted R <sup>2</sup> | P-value |
|--------------------------------------------|-------------------|----------------------|-------------------|----------|-------------------------|---------|
| <b>Region</b>                              |                   |                      |                   | 0.052    | 54.72                   | 0.1670  |
| North America                              | 4                 | 1.56 (1.16-2.11)     | 1.00              |          |                         |         |
| East and South-East Asia                   | 3                 | 2.69 (1.86-3.90)     | 1.72 (1.01-2.94)  |          |                         |         |
| Eastern Europe                             | 2                 | 2.34 (0.72-7.60)     | 1.50 (0.34-6.57)  |          |                         |         |
| Latin America                              | 2                 | 0.68 (0.30-1.57)     | 0.44 (0.14-1.38)  |          |                         |         |
| South Asia                                 | 2                 | 1.36 (0.45-4.11)     | 0.98 (0.37-2.60)  |          |                         |         |
| Australasia                                | 1                 | 2.16 (0.70-6.65)     | 1.39 (0.32-5.99)  |          |                         |         |
| <b>Economic level</b>                      |                   |                      |                   | 0.087    | 24.51                   | 0.303   |
| High income country                        | 5                 | 1.58 (1.20-2.09)     | 1.00              |          |                         |         |
| Lower/upper middle-income country          | 9                 | 2.01 (1.37-2.94)     | 1.30 (0.77-2.19)  |          |                         |         |
| <b>Females (%)</b>                         |                   |                      |                   | 0.097    | 20.06                   | 0.143   |
| 10% increase                               | 13                |                      | 0.84 (0.65-1.07)  |          |                         |         |
| <b>Age (mean/median)</b>                   |                   |                      |                   | 0.052    | 60.62                   | 0.016   |
| <34.3 years                                | 6                 | 2.40 (1.87-3.09)     | 1.00              |          |                         |         |
| >=34.3 years                               | 6                 | 1.28 (0.91-1.81)     | 0.54 (0.33-0.87)  |          |                         |         |
| <b>Duration of injecting (mean/median)</b> |                   |                      |                   | 0.073    | 36.41                   | 0.137   |
| <13.8 years                                | 4                 | 2.49 (1.64-3.77)     | 1.00              |          |                         |         |
| >=13.8 years                               | 4                 | 1.29 (0.83-1.99)     | 0.52 (0.27-1.00)  |          |                         |         |
| Not reported                               | 6                 | 1.89 (1.36-2.62)     | 0.76 (0.41-1.40)  |          |                         |         |
| <b>Baseline HIV prevalence</b>             |                   |                      |                   | 0.124    | -7.57                   | 0.346   |
| Per 10 % increase                          | 14                |                      | 1.13 (0.86-1.49)  |          |                         |         |
| <b>Proportion homeless</b>                 |                   |                      |                   | 0.179    | -55.60                  | 0.405   |
| <25.2%                                     | 3                 | 1.20 (0.54-2.66)     | 1.00              |          |                         |         |
| >=25.2%                                    | 3                 | 1.77 (1.34-2.34)     | 1.27 (0.45-3.61)  |          |                         |         |
| Not reported                               | 8                 |                      | 1.71 (0.70-4.17)  |          |                         |         |
| <b>OST coverage</b>                        |                   |                      |                   | 0.064    | 43.25                   | 0.152   |
| <19.4%                                     | 3                 | 2.13 (1.00,4.52)     | 1.00              |          |                         |         |
| >=19.4%                                    | 3                 | 2.04 (1.60-2.60)     | 0.84 (0.42-1.68)  |          |                         |         |
| Not reported                               | 8                 | 1.43 (1.05-1.95)     | 0.57 (0.30-1.10)  |          |                         |         |
| <b>Study design</b>                        |                   |                      |                   | 0.123    | -7.27                   | 0.801   |
| Longitudinal                               | 12                | 1.79 (1.36-2.36)     | 1.00              |          |                         |         |
| Cross-sectional                            | 2                 | 2.05 (0.98-4.27)     | 1.14 (0.38-3.38)  |          |                         |         |
| <b>Effect type</b>                         |                   |                      |                   | 0.159    | -38.19                  | 0.987   |
| Hazard ratio                               | 7                 | 1.87 (1.52-2.31)     | 1.00              |          |                         |         |
| Incidence rate ratio                       | 5                 | 1.59 (0.70-3.57)     | 0.92 (0.45-1.90)  |          |                         |         |
| Odds ratio                                 | 1                 | 1.91 (0.26-14.18)    | 1.04 (0.09-12.48) |          |                         |         |
| Risk ratio                                 | 1                 | 2.07 (0.94-4.56)     | 1.13 (0.30-4.28)  |          |                         |         |
| <b>Start of study</b>                      |                   |                      |                   | 0.130    | -12.67                  | 0.557   |
| <2001                                      | 7                 | 1.92 (1.39-2.65)     | 1.00              |          |                         |         |
| >=2001                                     | 7                 | 1.60 (1.00-2.56)     | 0.84 (0.45-1.57)  |          |                         |         |
| <b>Midpoint of study</b>                   |                   |                      |                   | 0.141    | -22.53                  | 0.866   |
| <2005.5                                    | 7                 | 1.84 (1.23-2.75)     | 1.00              |          |                         |         |
| >=2005.5                                   | 7                 | 1.80 (1.32-2.46)     | 0.95 (0.52-1.67)  |          |                         |         |
| <b>Length of study</b>                     |                   |                      |                   | 0.077    | 33.32                   | 0.104   |
| <5 years                                   | 6                 | 2.46 (1.92-3.15)     | 1.00              |          |                         |         |
| >=5 years                                  | 8                 | 1.57 (1.16-2.13)     | 0.65 (0.38-1.11)  |          |                         |         |
| <b>Prison population rate</b>              |                   |                      |                   | 0.144    | -24.78                  | 0.793   |
| Low (< global average - 144 per 100,000)   | 5                 | 1.8 (1.47-2.20)      | 1.00              |          |                         |         |
| High (>= global average - 144 per 100,000) | 9                 | 1.85 (1.19-2.87)     | 1.08 (0.58-2.01)  |          |                         |         |
| <b>Recent incarceration definition</b>     |                   |                      |                   | 0.046    | 59.88                   | 0.081   |
| Last 6 months                              | 10                | 1.55 (1.22-1.95)     | 1.00              |          |                         |         |
| Last 12 months                             | 2                 | 2.32 (0.95-5.64)     | 1.50 (0.50-4.50)  |          |                         |         |
| Last 3 months                              | 1                 | 3.10 (1.71-5.63)     | 2.00 (0.84-4.77)  |          |                         |         |
| Since last visit                           | 1                 | 3.39 (2.35-4.90)     | 2.19 (1.10-4.35)  |          |                         |         |
| Per 3-month increase                       | 13                |                      | 0.95 (0.60-1.51)  | 0.068    | -9.23                   | 0.819   |
| <b>Publication status</b>                  |                   |                      |                   | 0.046    | 59.67%                  | 0.018   |
| Unpublished                                | 10                | 1.47 (1.14-1.90)     | 1.00              |          |                         |         |
| Published                                  | 4                 | 2.59 (1.91-3.52)     | 1.76 (1.12-2.76)  |          |                         |         |

**Appendix Table 13: Uni-variable meta-regression for the effect of past incarceration on the risk of HIV acquisition.**

|                                            | Number of studies | Effect size (95% CI) | Ratio (95% CI)   | $\tau^2$ | Adjusted R <sup>2</sup> | P-value |
|--------------------------------------------|-------------------|----------------------|------------------|----------|-------------------------|---------|
| <b>Region</b>                              |                   |                      |                  | 0.046    | 53.06                   | 0.306   |
| East and South-East Asia                   | 3                 | 1.62 (1.20-2.20)     | 1.00             |          |                         |         |
| Eastern Europe                             | 2                 | 1.48 (0.42-4.94)     | 0.90 (0.26-3.10) |          |                         |         |
| Latin America                              | 2                 | 0.60 (0.32-1.13)     | 0.37 (0.13-1.09) |          |                         |         |
| North America                              | 2                 | 1.13 (0.60-2.13)     | 0.69 (0.3-1.47)  |          |                         |         |
| Australasia                                | 1                 | 0.71 (0.24-2.12)     | 0.44 (0.09-2.25) |          |                         |         |
| South Asia                                 | 1                 | 1.44 (0.42-4.94)     | 0.89 (0.15-5.38) |          |                         |         |
| Western Europe                             | 1                 | 2.40 (1.27-4.53)     | 1.49 (0.47-4.66) |          |                         |         |
| <b>Economic level</b>                      |                   |                      |                  | 0.123    | -26.06                  | 0.947   |
| High income country                        | 5                 | 1.25 (0.76-2.05)     | 1.00             |          |                         |         |
| Lower/upper middle-income country          | 7                 | 1.27 (0.89-1.79)     | 0.98 (0.50-1.93) |          |                         |         |
| <b>Females (%)</b>                         |                   |                      |                  | 0.012    | 87.53                   | 0.020   |
| 10% increase                               | 11                |                      | 0.78 (0.64-0.95) |          |                         |         |
| <b>Age (mean/median)</b>                   |                   |                      |                  | 0.064    | 48.42                   | 0.126   |
| <35.4 years                                | 5                 | 1.60 (1.23-2.08)     | 1.00             |          |                         |         |
| >=35.4 years                               | 5                 | 0.96 (0.54-1.71)     | 0.62 (0.32-1.18) |          |                         |         |
| <b>Duration of injecting (mean/median)</b> |                   |                      |                  | 0.040    | 58.93                   | 0.121   |
| <12.8 years                                | 4                 | 1.71 (1.32-2.23)     | 1.00             |          |                         |         |
| >=12.8 years                               | 4                 | 0.92 (0.69-1.22)     | 0.56 (0.30-1.02) |          |                         |         |
| Not reported                               | 4                 | 0.94 (0.45-1.97)     | 0.63 (0.32-1.21) |          |                         |         |
| <b>Baseline HIV prevalence</b>             |                   |                      |                  | 0.127    | -29.31                  | 0.323   |
| Per 10 % increase                          | 12                |                      | 1.15 (0.85-1.57) |          |                         |         |
| <b>Proportion homeless</b>                 |                   |                      |                  | 0.065    | 33.11                   | 0.152   |
| <23.1%                                     | 3                 | 0.61 (0.33-1.12)     | 1.00             |          |                         |         |
| >=23.1%                                    | 4                 | 1.39 (0.83-2.34)     | 2.19 (0.87-5.49) |          |                         |         |
| Not reported                               | 5                 | 1.53 (1.17-2.02)     | 2.39 (0.94-6.06) |          |                         |         |
| <b>OST coverage</b>                        |                   |                      |                  | 0.027    | 72.40                   | 0.077   |
| <19.4%                                     | 3                 | 1.86 (1.31-2.64)     | 1.00             |          |                         |         |
| >=19.4%                                    | 2                 | 0.82 (0.58-1.15)     | 0.44 (0.21-0.89) |          |                         |         |
| Not reported                               | 7                 | 1.17 (0.82-1.67)     | 0.66 (0.37-1.18) |          |                         |         |
| <b>Study design</b>                        |                   |                      |                  | 0.109    | -11.00                  | 0.375   |
| Longitudinal                               | 10                | 1.15 (0.81-1.62)     | 1.00             |          |                         |         |
| Cross-sectional                            | 2                 | 1.60 (1.10-2.31)     | 1.39 (0.63-3.06) |          |                         |         |
| <b>Effect type</b>                         |                   |                      |                  | 0.149    | -52.06                  | 0.735   |
| Hazard ratio                               | 6                 | 1.05 (0.67-1.64)     | 1.00             |          |                         |         |
| Incidence rate ratio                       | 4                 | 1.59 (1.06-2.40)     | 1.36 (0.52-3.54) |          |                         |         |
| Odds ratio                                 | 1                 | 1.65 (0.76-3.59)     | 1.56 (0.40-6.11) |          |                         |         |
| Risk ratio                                 | 1                 | 1.65 (1.09-2.51)     | 1.50 (0.48-4.62) |          |                         |         |
| <b>Start of study</b>                      |                   |                      |                  | 0.122    | -20.09                  | 0.909   |
| <2002                                      | 6                 | 1.27 (0.90-1.79)     | 1.00             |          |                         |         |
| >=2002                                     | 6                 | 1.19 (0.68-2.09)     | 0.96 (0.48-1.94) |          |                         |         |
| <b>Midpoint of study</b>                   |                   |                      |                  | 0.118    | -20.33                  | 0.645   |
| <2005.5                                    | 5                 | 1.32 (0.93-1.88)     | 1.00             |          |                         |         |
| >=2005.5                                   | 7                 | 1.12 (0.68-1.85)     | 0.87 (0.44-1.70) |          |                         |         |
| <b>Length of study</b>                     |                   |                      |                  | 0.021    | 78.06                   | 0.019   |
| <4 years                                   | 5                 | 1.74 (1.34-2.25)     | 1.00             |          |                         |         |
| >=4 years                                  | 7                 | 0.93 (0.64-1.35)     | 0.56 (0.35-0.89) |          |                         |         |
| <b>Prison population rate</b>              |                   |                      |                  | 0.129    | -32.00                  | 0.549   |
| Low (< global average - 144 per 100,000)   | 4                 | 1.39 (0.83-2.34)     | 1.00             |          |                         |         |
| High (>= global average - 144 per 100,000) | 8                 | 1.18 (0.83-1.70)     | 0.82 (0.41-1.65) |          |                         |         |
| <b>Past incarceration definition</b>       |                   |                      |                  | 0.090    | 10.11                   | 0.344   |
| Baseline                                   | 9                 | 1.07 (0.78-1.47)     | 1.00             |          |                         |         |
| Measured at first follow-up                | 1                 | 1.44 (0.42-4.94)     | 1.35 (0.26-6.99) |          |                         |         |
| Time varying                               | 1                 | 2.40 (1.27-4.53)     | 2.24 (0.76-6.61) |          |                         |         |

|                                          | Number of studies | Effect size (95% CI) | Ratio (95% CI)   | $\tau^2$ | Adjusted R <sup>2</sup> | P-value |
|------------------------------------------|-------------------|----------------------|------------------|----------|-------------------------|---------|
| Time varying measured at preceding visit | 1                 | 1.70 (1.09-2.65)     | 1.59 (0.62-4.06) |          |                         |         |
| <b>Publication status</b>                |                   |                      |                  | 0.034    | 64.98                   | 0.034   |
| Unpublished                              | 9                 | 1.00 (0.73-1.38)     | 1.00             |          |                         |         |
| Published                                | 3                 | 1.76 (1.34-2.32)     | 1.76 (1.05-2.92) |          |                         |         |

**Appendix Table 14: Multi-variable meta-regression for the effect of recent incarceration on the risk of HIV acquisition.**

|                            | Ratio (95% CI)   | P-Value |
|----------------------------|------------------|---------|
| <b>Age (mean/median)</b>   |                  |         |
| <33.6 years                | 1.00             |         |
| >=33.6 years               | 0.59 (0.17-2.09) | 0.332   |
| <b>Proportion homeless</b> |                  |         |
| <25.2%                     | 1.00             |         |
| >=25.2%                    | 1.17 (0.26-5.35) | 0.801   |
| Not reported               | 1.12 (0.23-5.58) | 0.860   |
| <b>OST coverage</b>        |                  |         |
| <19.4%                     | 1.00             |         |
| >=19.4%                    | 1.05 (0.29-3.80) | 0.929   |
| Not reported               | 0.75 (0.14-4.02) | 0.682   |
| <b>Publication status</b>  |                  |         |
| Unpublished                | 1.00             |         |
| Published                  | 0.97 (0.11-8.56) | 0.566   |

**Appendix Table 15: Multi-variable meta-regression for the effect of past incarceration on the risk of HIV acquisition.**

|                            | Ratio (95% CI)   | P-Value |
|----------------------------|------------------|---------|
| <b>Females (%)</b>         |                  |         |
| 10% increase               | 0.97 (0.55-1.74) | 0.896   |
| <b>Proportion homeless</b> |                  |         |
| <23.1%                     | 1.00             |         |
| >=23.1%                    | 2.44 (0.73-8.22) | 0.101   |
| Not reported               | 1.53 (0.25-9.30) | 0.505   |
| <b>OST coverage</b>        |                  |         |
| <19.4%                     | 1.00             |         |
| >=19.4%                    | 0.56 (0.11-2.71) | 0.323   |
| Not reported               | 0.99 (0.39-2.51) | 0.970   |
| <b>Length of study</b>     |                  |         |
| <4 years                   | 1.00             |         |
| >=4 years                  | 0.57 (0.10-3.35) | 0.383   |
| <b>Publication status</b>  |                  |         |
| Unpublished                | 1.00             |         |
| Published                  | 0.93 (0.20-4.23) | 0.888   |

**Appendix Table 16: Uni-variable meta-regression for the effect of recent incarceration on the risk of HCV acquisition.**

|                                            | Number of studies | Effect size (95% CI) | Ratio (95% CI)    | $\tau^2$ | Adjusted R <sup>2</sup> | P-value |
|--------------------------------------------|-------------------|----------------------|-------------------|----------|-------------------------|---------|
| <b>Region</b>                              |                   |                      |                   | 0.080    | 31.40                   | 0.360   |
| North America                              | 8                 | 1.59 (1.17-2.16)     | 1.00              |          |                         |         |
| Western Europe                             | 4                 | 1.18 (0.77-1.82)     | 0.77 (0.41-1.45)  |          |                         |         |
| Australasia                                | 3                 | 2.78 (2.01-3.83)     | 1.71 (0.86-3.38)  |          |                         |         |
| Eastern Europe                             | 1                 | 1.56 (0.57-4.23)     | 0.99 (0.26-3.65)  |          |                         |         |
| South Asia                                 | 1                 | 1.36 (0.60-3.09)     | 0.86 (0.27-2.71)  |          |                         |         |
| <b>Economic level</b>                      |                   |                      |                   | 0.125    | -7.44                   | 0.772   |
| High income country                        | 15                | 1.64 (1.27-2.12)     | 1.00              |          |                         |         |
| Lower/upper middle-income country          | 2                 | 1.44 (0.76-2.71)     | 0.88 (0.35-2.21)  |          |                         |         |
| <b>Females (%)</b>                         |                   |                      |                   | 0.141    | -13.60                  | 0.738   |
| 10% increase                               | 16                |                      | 1.03 (0.84-1.27)  |          |                         |         |
| <b>Age (mean/median)</b>                   |                   |                      |                   | 0.094    | -34.27                  | 0.695   |
| <29.8 years                                | 7                 | 1.40 (0.99-1.97)     | 1.00              |          |                         |         |
| >=29.8 years                               | 6                 | 1.55 (1.06-2.27)     | 1.11 (0.62-1.99)  |          |                         |         |
| <b>Duration of injecting (mean/median)</b> |                   |                      |                   | 0.102    | -1.77                   | 0.344   |
| <7 years                                   | 5                 | 1.43 (0.85-2.39)     | 1.00              |          |                         |         |
| >=7 years                                  | 5                 | 2.00 (1.36-2.92)     | 1.38 (0.66-2.91)  |          |                         |         |
| <b>Baseline HCV prevalence</b>             |                   |                      |                   | 0.091    | 17.65                   | 0.257   |
| Per 10 % increase                          | 12                |                      | 0.92 (0.79-1.07)  |          |                         |         |
| <b>Proportion homeless</b>                 |                   |                      |                   | .116     | 1.09                    | 0.610   |
| <42.8%                                     | 4                 | 1.27 (0.99-1.63)     | 1.00              |          |                         |         |
| >=42.8%                                    | 5                 | 1.67 (1.06-2.64)     | 1.25 (0.65-2.39)  |          |                         |         |
| Not reported                               | 8                 | 1.78 (1.15-2.74)     | 1.34 (0.71-2.55)  |          |                         |         |
| <b>OST coverage</b>                        |                   |                      |                   | 0.091    | 7.47%                   | 0.447   |
| <33.1%                                     | 5                 | 1.66 (1.12-2.44)     | 1.00              |          |                         |         |
| >=33.1%                                    | 5                 | 2.30 (1.70-3.12)     | 1.26 (0.65-2.42)  |          |                         |         |
| <b>Study design</b>                        |                   |                      |                   | 0.125    | -7.39                   | 0.758   |
| Longitudinal                               | 14                | 1.59 (1.22-2.08)     | 1.00              |          |                         |         |
| Cross-sectional                            | 3                 | 1.79 (1.06-3.02)     | 1.12 (0.52-2.42)  |          |                         |         |
| <b>Effect type</b>                         |                   |                      |                   | 0.136    | -16.50                  | 0.885   |
| Hazard ratio                               | 7                 | 1.65 (1.15-2.37)     | 1.00              |          |                         |         |
| Incidence rate ratio                       | 7                 | 1.46 (1.00-2.12)     | 0.90 (0.49-1.64)  |          |                         |         |
| Risk ratio                                 | 3                 | 1.79 (1.06-3.02)     | 1.08 (0.48-2.44)  |          |                         |         |
| <b>Start of study</b>                      |                   |                      |                   | 0.139    | -19.35%                 | 0.642   |
| <2003                                      | 6                 | 1.50 (0.95-2.35)     | 1.00              |          |                         |         |
| >=2003                                     | 11                | 1.69 (1.27-2.26)     | 1.13 (0.65-1.96)  |          |                         |         |
| <b>Midpoint of study</b>                   |                   |                      |                   | 0.123    | -5.24                   | 0.951   |
| <2006                                      | 7                 | 1.57 (0.98-2.53)     | 1.00              |          |                         |         |
| >=2006                                     | 10                | 1.62 (1.23-2.13)     | 1.02 (0.59-1.76)  |          |                         |         |
| <b>Length of study</b>                     |                   |                      |                   | 0.129    | -10.68                  | 0.740   |
| <7 years                                   | 8                 | 1.45 (1.10-1.90)     | 1.00              |          |                         |         |
| >=7 years                                  | 9                 | 1.66 (1.17-2.37)     | 1.09 (0.63-1.89)  |          |                         |         |
| <b>Prison population rate</b>              |                   |                      |                   | 0.046    | 60.50                   | 0.022   |
| Low (< global average - 144 per 100,000)   | 11                | 1.40 (1.10-1.80)     | 1.00              |          |                         |         |
| High (>= global average - 144 per 100,000) | 6                 | 2.57 (1.95-3.38)     | 1.74 (1.09-2.76)  |          |                         |         |
| <b>Recent incarceration definition</b>     |                   |                      |                   | 0.080    | 31.42                   | 0.404   |
| Last 6 months                              | 8                 | 1.54 (1.16-2.05)     | 1.00              |          |                         |         |
| Last 12 months                             | 5                 | 2.15 (1.50-3.07)     | 1.31 (0.74-2.31)  |          |                         |         |
| Last 3 months                              | 2                 | 1.75 (0.74-4.12)     | 1.22 (0.56-2.68)  |          |                         |         |
| Last 2 years                               | 1                 | 2.75 (0.34-21.99)    | 1.79 (0.16-19.92) |          |                         |         |
| Since last visit                           | 1                 | 0.79 (0.42-1.48)     | 0.51 (0.19-1.37)  |          |                         |         |
| Per 3-month increase                       | 16                |                      | 1.08 (0.87-1.34)  | 0.09     | 3.10                    | 0.445   |
| <b>Publication status</b>                  |                   |                      |                   | 0.124    | 57.78%                  | 0.961   |
| Unpublished                                | 10                | 1.61 (1.22-2.12)     | 1.00              |          |                         |         |
| Published                                  | 7                 | 1.58 (1.02-2.45)     | 0.99 (0.58-1.70)  |          |                         |         |

**Appendix Table 17: Uni-variable meta-regression for the effect of past incarceration on the risk of HCV acquisition.**

|                                             | Number of studies | Effect size (95% CI) | Ratio (95% CI)   | $\tau^2$ | Adjusted R <sup>2</sup> | P-value |
|---------------------------------------------|-------------------|----------------------|------------------|----------|-------------------------|---------|
| <b>Region</b>                               |                   |                      |                  | 0.072    | -7.10                   | 0.404   |
| North America                               | 7                 | 1.03 (0.86-1.24)     | 1.00             |          |                         |         |
| Western Europe                              | 7                 | 1.31 (1.14-1.51)     | 1.28 (0.84-1.96) |          |                         |         |
| Australasia                                 | 5                 | 0.99 (0.35-2.86)     | 1.05 (0.62-1.78) |          |                         |         |
| Eastern Europe                              | 2                 | 0.67 (0.28-1.60)     | 0.61 (0.21-1.77) |          |                         |         |
| South Asia                                  | 1                 | 2.04 (0.9-4.65)      | 1.87 (0.63-5.58) |          |                         |         |
| <b>Economic level</b>                       |                   |                      |                  | 0.071    | -5.68                   | 0.808   |
| High income country                         | 20                | 1.21 (1.02-1.43)     | 1.00             |          |                         |         |
| Lower/upper middle-income country           | 2                 | 1.13 (0.29-4.44)     | 1.11 (0.46-2.71) |          |                         |         |
| <b>Females (%)</b>                          |                   |                      |                  | 0.074    | -4.44                   | 0.482   |
| 10% increase                                | 21                |                      | 1.05 (0.91-1.21) |          |                         |         |
| <b>Age (mean/ median)</b>                   |                   |                      |                  | 0.065    | 9.41                    | 0.377   |
| <25 years                                   | 10                | 1.29 (0.94-1.76)     | 1.00             |          |                         |         |
| >=25 years                                  | 11                | 1.12 (0.92-1.37)     | 0.85 (0.58-1.24) |          |                         |         |
| <b>Duration of injecting (mean/ median)</b> |                   |                      |                  | 0.063    | -19.80                  | 0.667   |
| <7 years                                    | 7                 | 1.05 (0.75-1.47)     | 1.00             |          |                         |         |
| >=7 years                                   | 8                 | 1.15 (0.91-1.45)     | 1.10 (0.70-1.73) |          |                         |         |
| <b>Baseline HCV prevalence</b>              |                   |                      |                  | 0.020    | 12.57                   | 0.237   |
| Per 10 % increase                           | 16                |                      | 0.94 (0.86-1.04) |          |                         |         |
| <b>Proportion homeless</b>                  |                   |                      |                  | 0.044    | -15.68                  | 0.469   |
| <29.7%                                      | 7                 | 1.22 (0.89-1.67)     | 1.00             |          |                         |         |
| >=29.7%                                     | 8                 | 1.03 (0.82-1.29)     | 0.87 (0.57-1.32) |          |                         |         |
| <b>OST coverage</b>                         |                   |                      |                  | 0.027    | -21.72                  | 0.743   |
| <31.0%                                      | 7                 | 1.04 (0.83-1.30)     | 1.00             |          |                         |         |
| >=31.0%                                     | 8                 | 1.12 (0.86-1.46)     | 1.06 (0.72-1.56) |          |                         |         |
| <b>Study design</b>                         |                   |                      |                  | 0.077    | -14.78                  | 0.561   |
| Longitudinal                                | 19                | 1.18 (0.97-1.44)     | 1.00             |          |                         |         |
| Cross-sectional                             | 3                 | 1.27 (0.98-1.66)     | 1.15 (0.70-1.92) |          |                         |         |
| <b>Effect type</b>                          |                   |                      |                  | 0.070    | -4.50                   | 0.4497  |
| Incidence rate ratio                        | 14                | 1.25 (0.95-1.64)     | 1.00             |          |                         |         |
| Hazard ratio                                | 4                 | 0.92 (0.68-1.25)     | 0.73 (0.45-1.18) |          |                         |         |
| Risk ratio                                  | 3                 | 1.25 (1.07-1.46)     | 0.99 (0.62-1.57) |          |                         |         |
| Odds ratio                                  | 1                 | 1.74 (0.93-3.26)     | 1.36 (0.55-3.38) |          |                         |         |
| <b>Start of study</b>                       |                   |                      |                  | 0.074    | -10.95                  | 0.411   |
| <2002                                       | 9                 | 1.31 (0.97-1.78)     | 1.00             |          |                         |         |
| >=2002                                      | 13                | 1.13 (0.94-1.36)     | 0.86 (0.59-1.25) |          |                         |         |
| <b>Midpoint of study</b>                    |                   |                      |                  | 0.040    | 39.95                   | 0.024   |
| <2005.8                                     | 11                | 1.48 (1.18-1.86)     | 1.00             |          |                         |         |
| >=2005.8                                    | 11                | 1.02 (0.84-1.24)     | 0.69 (0.50-0.95) |          |                         |         |
| <b>Length of study</b>                      |                   |                      |                  | 0.076    | -14.39                  | 0.766   |
| <5 years                                    | 8                 | 1.18 (0.90-1.55)     | 1.00             |          |                         |         |
| >=5 years                                   | 14                | 1.23 (0.99-1.53)     | 1.06 (0.70-1.60) |          |                         |         |
| <b>Prison population rate</b>               |                   |                      |                  | 0.077    | -14.55                  | 0.497   |
| Low (< global average - 144 per 100,000)    | 12                | 1.22 (1.05-1.43)     | 1.00             |          |                         |         |
| High (>= global average - 144 per 100,000)  | 10                | 1.03 (0.69-1.54)     | 0.88 (0.60-1.29) |          |                         |         |
| <b>Past incarceration definition</b>        |                   |                      |                  | 0.077    | -7.11                   | 0.591   |
| Baseline                                    | 19                | 1.19 (0.99-1.44)     | 1.00             |          |                         |         |
| Measured at first follow-up                 | 1                 | 2.04 (0.90-4.65)     | 1.71 (0.58-5.10) |          |                         |         |
| Measured during last period of follow up    | 1                 | 1.20 (0.57-2.50)     | 1.00 (0.36-2.76) |          |                         |         |
| <b>Publication status</b>                   |                   |                      |                  | 0.045    | 20.80                   | 0.177   |
| Unpublished                                 | 11                | 1.10 (0.88-1.38)     | 1.00             |          |                         |         |
| Published                                   | 11                | 1.39 (1.11-1.74)     | 1.26 (0.89-1.77) |          |                         |         |

**Appendix Table 18: Multi-variable meta-regression for the effect of recent incarceration on the risk of HCV acquisition.**

|                                            | Ratio (95% CI)   | P-Value |
|--------------------------------------------|------------------|---------|
| <b>Proportion homeless</b>                 |                  |         |
| <42.8%                                     | 1.00             |         |
| >=42.8%                                    | 1.62 (0.88-2.99) | 0.110   |
| Not reported                               | 0.95 (0.35-2.54) | 0.907   |
| <b>OST coverage</b>                        |                  |         |
| <33.1%                                     | 1.00             |         |
| >=33.1%                                    | 0.99 (0.51-1.70) | 0.979   |
| Not reported                               | 0.66 (0.36-1.23) | 0.405   |
| <b>Prison Population Rate</b>              |                  |         |
| Low (< Global Average - 144 per 100,000)   | 1.00             |         |
| High (>= Global Average - 144 per 100,000) | 2.25 (0.91-1.91) | 0.077   |

**Appendix Table 19: Multi-variable meta-regression for the effect of past incarceration on the risk of HCV acquisition.**

|                            | Ratio (95% CI)   | P-Value |
|----------------------------|------------------|---------|
| <b>Proportion homeless</b> |                  |         |
| <29.7%                     | 1.00             |         |
| >=29.7%                    | 0.73 (0.41-1.29) | 0.242   |
| <b>OST coverage</b>        |                  |         |
| <31.0%                     | 1.00             |         |
| >=31.0%                    | 0.91 (0.51-1.62) | 0.714   |
| <b>Midpoint of Study</b>   |                  |         |
| <2005.8                    | 1.00             |         |
| >=2005.8                   | 0.73 (0.42-1.26) | 0.221   |

**Appendix Table 20: Analysis of confounding: uni-variable meta-regression for the adjusted effect of recent incarceration on the risk of HCV acquisition.**

|                                                | Number of studies | Effect size (95% CI) | Ratio (95% CI)   | $\tau^2$ | Adjusted R <sup>2</sup> | P-value |
|------------------------------------------------|-------------------|----------------------|------------------|----------|-------------------------|---------|
| <b>Adjusted for recent homelessness</b>        |                   |                      |                  |          |                         |         |
| No                                             | 4                 | 2.27 (1.71-3.03)     | 1.00             |          |                         |         |
| Yes                                            | 7                 | 1.40 (1.03-1.90)     | 0.66 (0.37-1.17) | 0.068    | 44.00                   | 0.132   |
| <b>Adjusted for recent OST exposure</b>        |                   |                      |                  |          |                         |         |
| No                                             | 3                 | 2.16 (1.44-3.24)     | 1.00             |          |                         |         |
| yes                                            | 8                 | 1.44 (1.08-1.92)     | 0.68 (0.37-1.26) | 0.075    | 38.01                   | 0.192   |
| <b>Adjusted for recent stimulant injecting</b> |                   |                      |                  |          |                         |         |
| No                                             | 2                 | 1.64 (1.18-2.26)     | 1.00             |          |                         |         |
| yes                                            | 9                 | 1.56 (1.11-2.21)     | 0.90 (0.37-2.20) | 0.156    | -29.12                  | 0.795   |

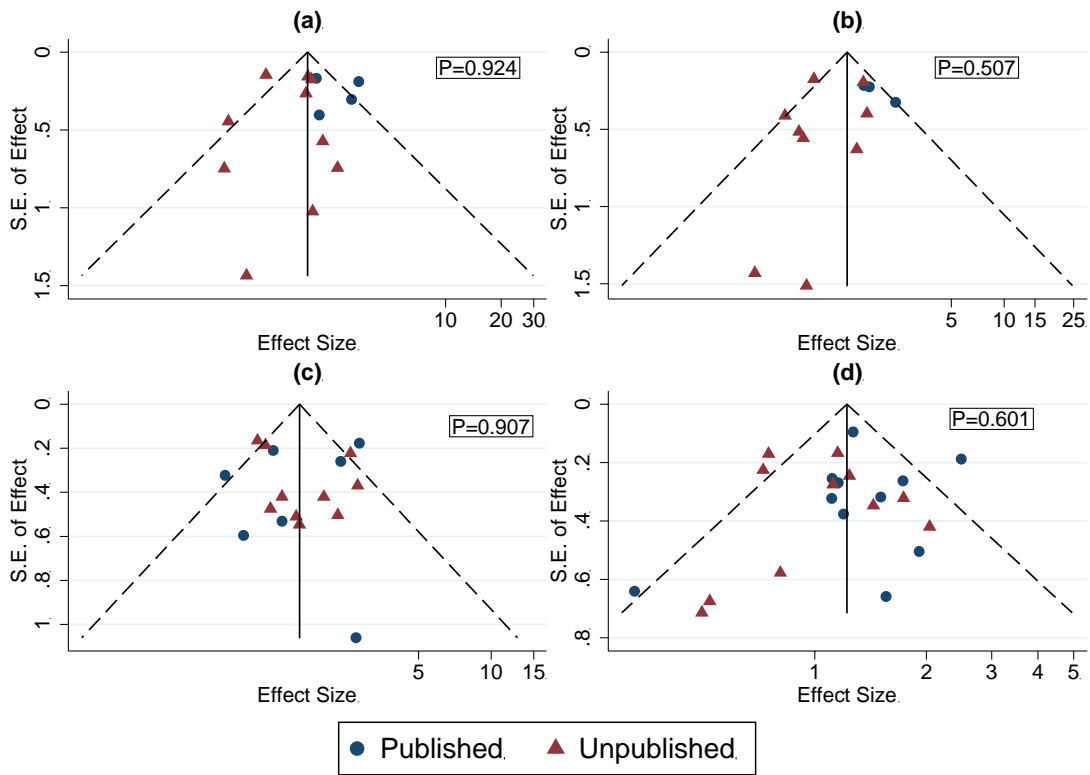

**Appendix Figure 1: Funnel plot of studies included in the meta-analysis of: (a) the effect of recent incarceration on HIV acquisition risk; (b) the effect of past incarceration on HIV acquisition risk; (c) the effect of recent incarceration on HCV acquisition risk; (d) the effect of past incarceration on HCV acquisition risk. The central lines are plotted at the fixed-effect summary effects while boxes show the p-values for Egger's tests.**



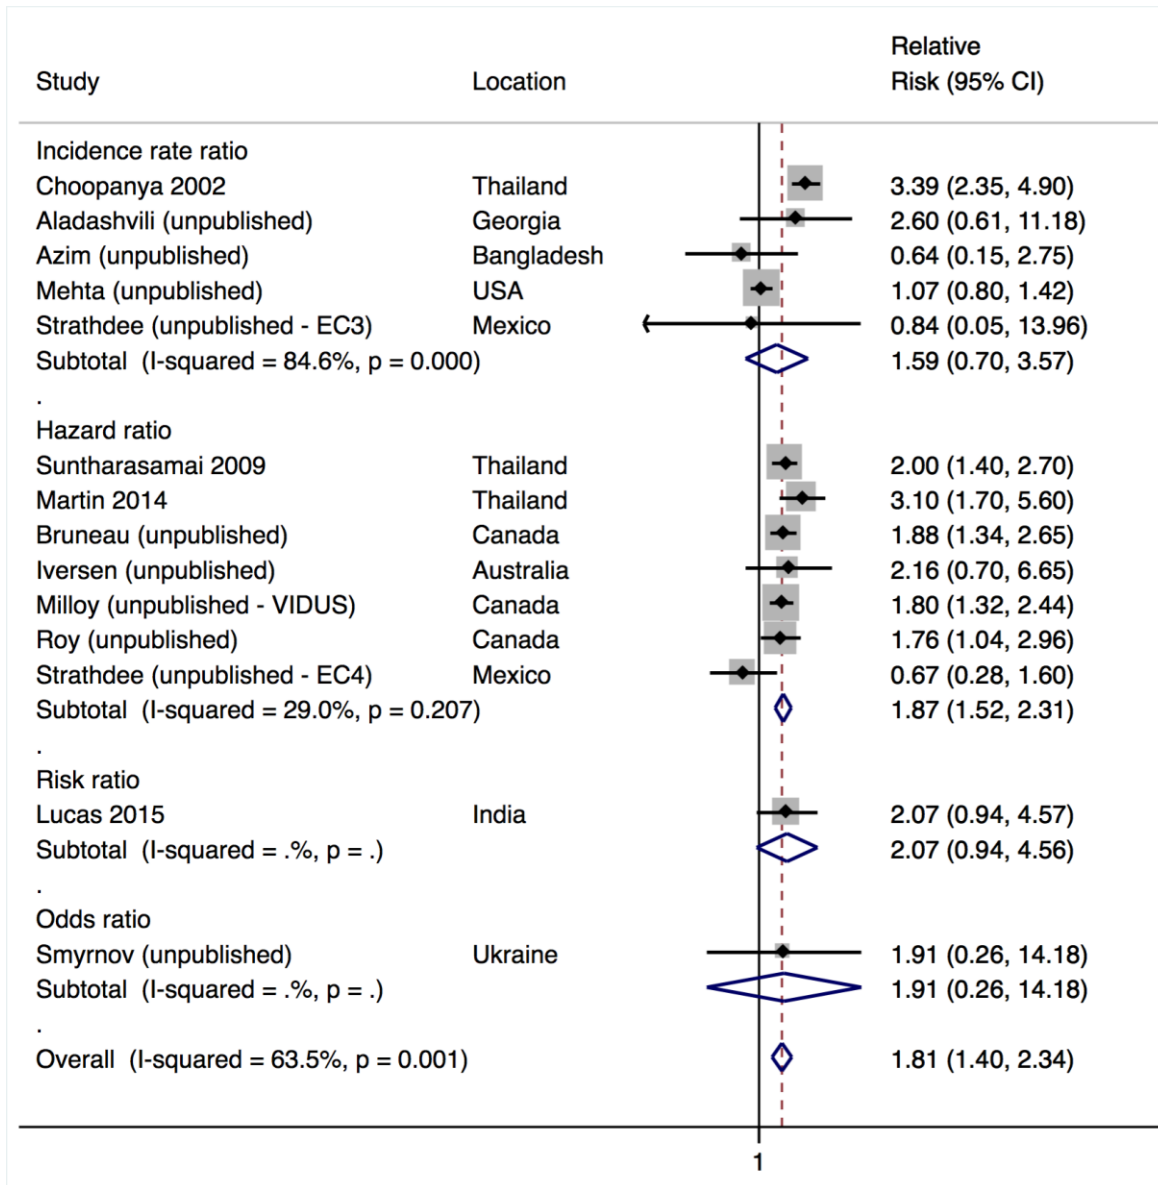

**Appendix Figure 2: Meta-analysis of studies showing the crude effect of recent incarceration on the risk of HIV acquisition among PWID, by effect type.**

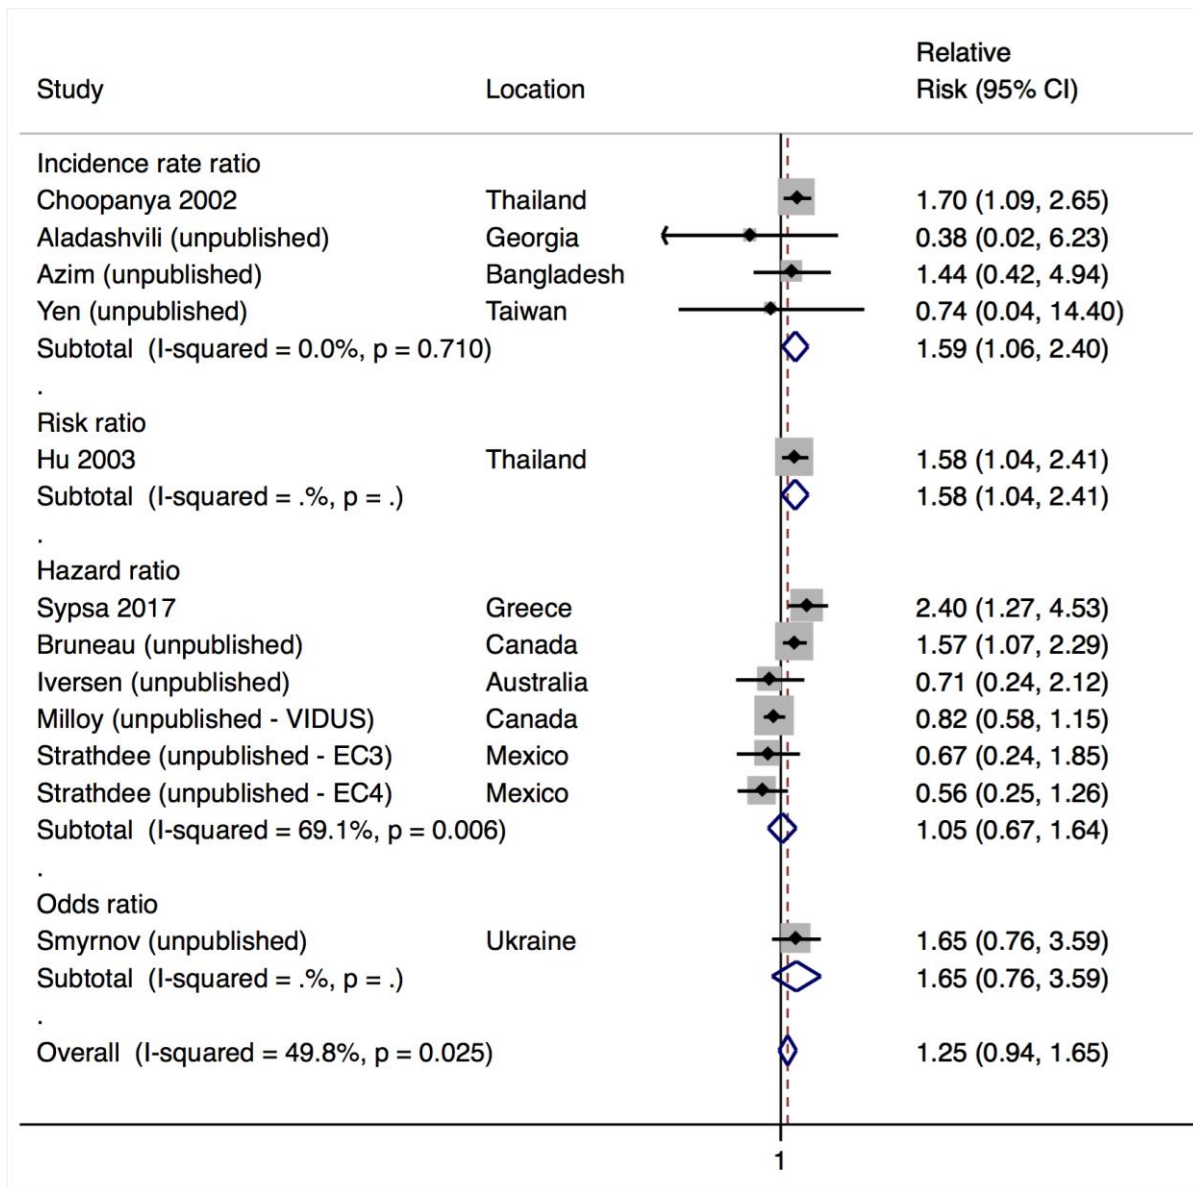

**Appendix Figure 3: Meta-analysis of studies showing the crude effect of past incarceration on the risk of HIV acquisition among PWID, by effect type.**

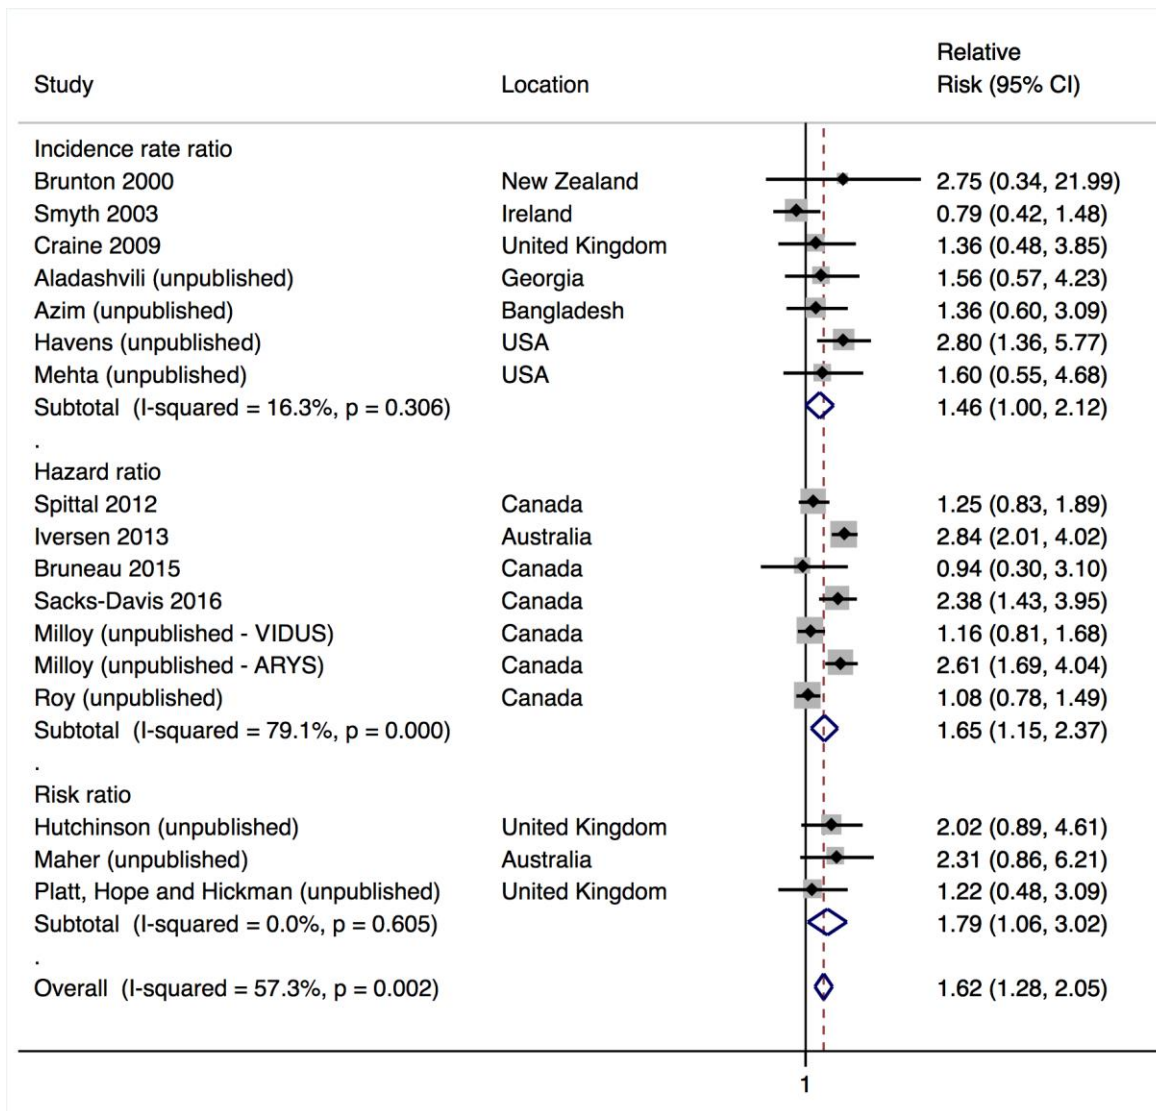

**Appendix Figure 4: Meta-analysis of studies showing the crude effect of recent incarceration on the risk of HCV acquisition among PWID, by effect type.**

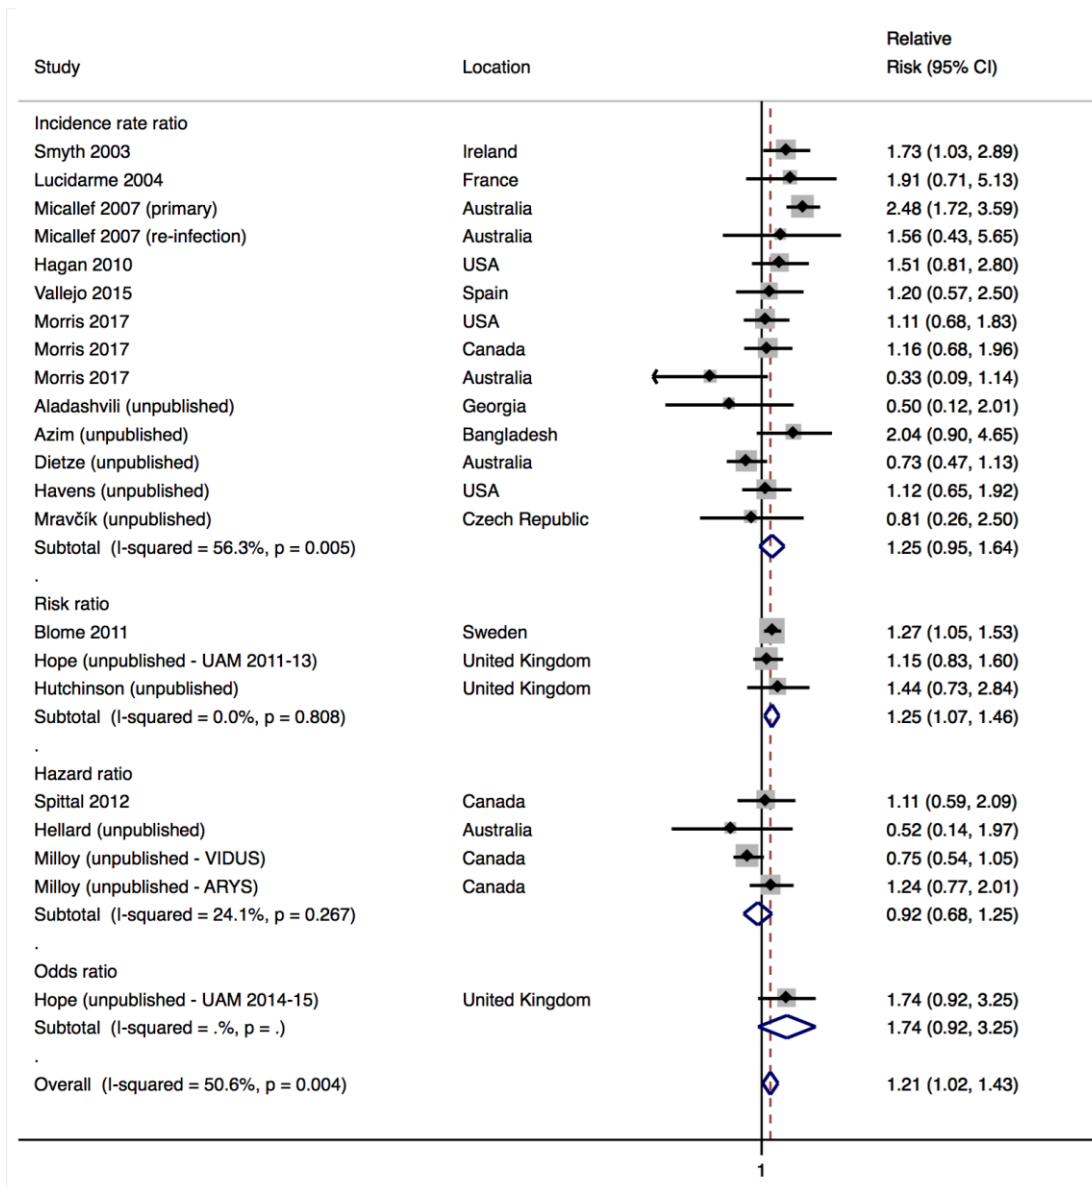

**Appendix Figure 5: Meta-analysis of studies showing the crude effect of past incarceration on the risk of HCV acquisition among PWID, by effect type.**

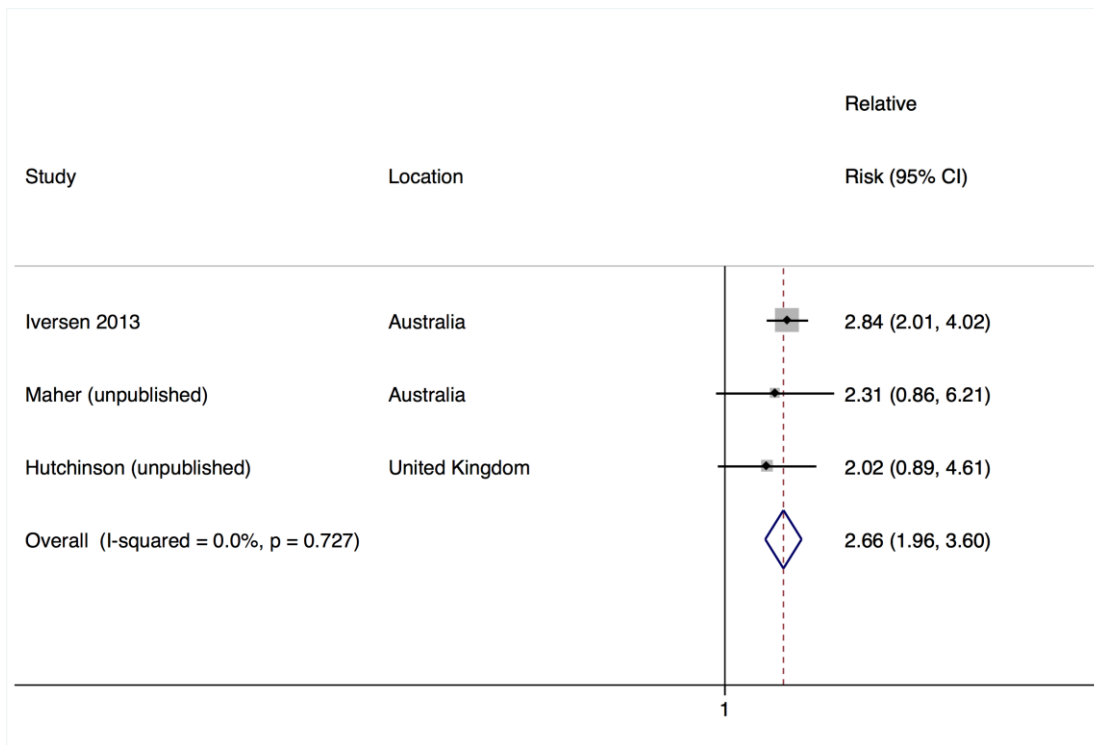

**Appendix Figure 6: Meta-analysis of the crude effect of recent incarceration on the risk of HCV acquisition among PWID in settings with low HCV incidence in prisons showing.**

## References

1. Ahamad K, Hayashi K, Nguyen P, et al. Effect of low-threshold methadone maintenance therapy for people who inject drugs on HIV incidence in Vancouver, BC, Canada: an observational cohort study. *Lancet HIV* 2015; **2**(10): e445-50.
2. Aitken CK, Lewis J, Tracy SL, et al. High incidence of hepatitis C virus reinfection in a cohort of injecting drug users. *Hepatology* 2008; **48**(6): 1746-52.
3. Allen EJ, Palmateer NE, Hutchinson SJ, Cameron S, Goldberg DJ, Taylor A. Association between harm reduction intervention uptake and recent hepatitis C infection among people who inject drugs attending sites that provide sterile injecting equipment in Scotland. *Int J Drug Policy* 2012; **23**(5): 346-52.
4. Boileau C, Bruneau J, Al-Nachawati H, Lamothe F, Vincelette J. A prognostic model for HIV seroconversion among injection drug users as a tool for stratification in clinical trials. *J Acquir Immune Defic Syndr* 2005; **39**(4): 489-95.
5. Bruneau J, Roy E, Arruda N, Zang G, Jutras-Aswad D. The rising prevalence of prescription opioid injection and its association with hepatitis C incidence among street-drug users. *Addiction* 2012; **107**(7): 1318-27.
6. Craib KJ, Spittal PM, Wood E, et al. Risk factors for elevated HIV incidence among Aboriginal injection drug users in Vancouver. *Cmaj* 2003; **168**(1): 19-24.
7. Cullen KJ, Hope VD, Croxford S, Shute J, Ncube F, Parry JV. Factors associated with recently acquired hepatitis C virus infection in people who inject drugs in England, Wales and Northern Ireland: new findings from an unlinked anonymous monitoring survey. *Epidemiol Infect* 2015; **143**(7): 1398-407.
8. Hahn JA, Page-Shafer K, Lum PJ, et al. Hepatitis C virus seroconversion among young injection drug users: relationships and risks. *J Infect Dis* 2002; **186**(11): 1558-64.
9. Hope VD, Hickman M, Ngui SL, et al. Measuring the incidence, prevalence and genetic relatedness of hepatitis C infections among a community recruited sample of injecting drug users, using dried blood spots. *J Viral Hepat* 2011; **18**(4): 262-70.
10. Hudgens MG, Longini IM, Jr., Vanichseni S, et al. Subtype-specific transmission probabilities for human immunodeficiency virus type 1 among injecting drug users in Bangkok, Thailand. *Am J Epidemiol* 2002; **155**(2): 159-68.
11. Kerr T, Shannon K, Ti L, et al. Sex work and HIV incidence among people who inject drugs. *AIDS* 2016; **30**(4): 627-34.
12. Martin M, Vanichseni S, Suntharasamai P, et al. Drug use and the risk of HIV infection amongst injection drug users participating in an HIV vaccine trial in Bangkok, 1999-2003. *Int J Drug Policy* 2010; **21**(4): 296-301.
13. Montain J, Ti L, Hayashi K, Nguyen P, Wood E, Kerr T. Impact of length of injecting career on HIV incidence among people who inject drugs. *Addict Behav* 2016; **58**: 90-4.
14. Morris MD, Shiboski S, Bruneau J, et al. Geographic Differences in Temporal Incidence Trends of Hepatitis C Virus Infection Among People Who Inject Drugs: The InC3 Collaboration. *Clin Infect Dis* 2017; **64**(7): 860-9.
15. Nelson KE, Galai N, Safaeian M, Strathdee SA, Celentano DD, Vlahov D. Temporal trends in the incidence of human immunodeficiency virus infection and risk behavior among injection drug users in Baltimore, Maryland, 1988-1998. *Am J Epidemiol* 2002; **156**(7): 641-53.
16. Patrick DM, Tyndall MW, Cornelisse PG, et al. Incidence of hepatitis C virus infection among injection drug users during an outbreak of HIV infection. *Cmaj* 2001; **165**(7): 889-95.
17. Spittal PM, Craib KJ, Wood E, et al. Risk factors for elevated HIV incidence rates among female injection drug users in Vancouver. *Cmaj* 2002; **166**(7): 894-9.
18. Stone J, Martin NK, Hickman M, et al. Modelling the impact of incarceration and prison-based hepatitis C virus (HCV) treatment on HCV transmission among people who inject drugs in Scotland. *Addiction* 2017; **112**(7): 1302-14.
19. Strathdee SA, Galai N, Safaeian M, et al. Sex differences in risk factors for HIV seroconversion among injection drug users: a 10-year perspective. *Arch Intern Med* 2001; **161**(10): 1281-8.
20. Tyndall MW, Currie S, Spittal P, et al. Intensive injection cocaine use as the primary risk factor in the Vancouver HIV-1 epidemic. *AIDS* 2003; **17**(6): 887-93.
21. Vanichseni S, Kitayaporn D, Mastro TD, et al. Continued high HIV-1 incidence in a vaccine trial preparatory cohort of injection drug users in Bangkok, Thailand. *AIDS* 2001; **15**(3): 397-405.
22. Choopanya K, Des Jarlais DC, Vanichseni S, et al. Incarceration and risk for HIV infection among injection drug users in Bangkok. *J Acquir Immune Defic Syndr* 2002; **29**(1): 86-94.
23. Lucas GM, Solomon SS, Srikrishnan AK, et al. High HIV burden among people who inject drugs in 15 Indian cities. *AIDS* 2015; **29**(5): 619-28.
24. Martin M, Vanichseni S, Suntharasamai P, et al. Risk behaviors and risk factors for HIV infection among participants in the Bangkok tenofovir study, an HIV pre-exposure prophylaxis trial among people who inject drugs. *PLoS One* 2014; **9**(3): e92809.

25. Suntharasamai P, Martin M, Vanichseni S, et al. Factors associated with incarceration and incident human immunodeficiency virus (HIV) infection among injection drug users participating in an HIV vaccine trial in Bangkok, Thailand, 1999-2003. *Addiction* 2009; **104**(2): 235-42.
26. Hu DJ, Vanichseni S, Mock PA, et al. HIV type 1 incidence estimates by detection of recent infection from a cross-sectional sampling of injection drug users in Bangkok: use of the IgG capture BED enzyme immunoassay. *AIDS Res Hum Retroviruses* 2003; **19**(9): 727-30.
27. Sypsa V, Psychogiou M, Paraskevis D, et al. Rapid Decline in HIV Incidence Among Persons Who Inject Drugs During a Fast-Track Combination Prevention Program After an HIV Outbreak in Athens. *J Infect Dis* 2017; **215**(10): 1496-505.
28. Bruneau J, Zang G, Jutras-Aswad D, et al. Hepatitis C spontaneous clearance may induce partial protection against reinfection among persons who inject drugs: Results from a cohort study. *Journal of Hepatology* 2015; **62**: S828.
29. Brunton C, Kemp R, Raynel P, Harte D, Baker M. Cumulative incidence of hepatitis C seroconversion in a cohort of seronegative injecting drug users. *N Z Med J* 2000; **113**(1106): 98-101.
30. Craine N, Hickman M, Parry JV, et al. Incidence of hepatitis C in drug injectors: the role of homelessness, opiate substitution treatment, equipment sharing, and community size. *Epidemiol Infect* 2009; **137**(9): 1255-65.
31. Iversen J, Wand H, Topp L, Kaldor J, Maher L. Reduction in HCV incidence among injection drug users attending needle and syringe programs in Australia: a linkage study. *Am J Public Health* 2013; **103**(8): 1436-44.
32. Sacks-Davis R, Daniel M, Roy E, et al. The role of living context in prescription opioid injection and the associated risk of hepatitis C infection. *Addiction* 2016; **111**(11): 1985-96.
33. Smyth B, O'Connor J, Barry J, Keenan E. Retrospective cohort study examining incidence of HIV and hepatitis C infection among injecting drug users in Dublin. *J Epidemiol Community Health* 2003; **57**(4): 310-1.
34. Spittal PM, Pearce ME, Chavoshi N, et al. The Cedar Project: high incidence of HCV infections in a longitudinal study of young Aboriginal people who use drugs in two Canadian cities. *BMC Public Health* 2012; **12**: 632.
35. Tsui JI, Evans JL, Lum PJ, Hahn JA, Page K. Association of opioid agonist therapy with lower incidence of hepatitis C virus infection in young adult injection drug users. *JAMA Intern Med* 2014; **174**(12): 1974-81.
36. Blome MA, Bjorkman P, Flamholz L, Jacobsson H, Molnegren V, Widell A. Minimal transmission of HIV despite persistently high transmission of hepatitis C virus in a Swedish needle exchange program. *J Viral Hepat* 2011; **18**(12): 831-9.
37. Horyniak D, Higgs P, Jenkinson R, et al. Establishing the Melbourne Injecting Drug User Cohort Study (MIX): rationale, methods, and baseline and twelve-month follow-up results. *Harm Reduct J* 2013; **10**: 11.
38. Hagan H, Pouget ER, Williams IT, et al. Attribution of hepatitis C virus seroconversion risk in young injection drug users in 5 US cities. *J Infect Dis* 2010; **201**(3): 378-85.
39. Lucidarme D, Bruandet A, Ille D, et al. Incidence and risk factors of HCV and HIV infections in a cohort of intravenous drug users in the North and East of France. *Epidemiol Infect* 2004; **132**(4): 699-708.
40. Micallef JM, Macdonald V, Jauncey M, et al. High incidence of hepatitis C virus reinfection within a cohort of injecting drug users. *J Viral Hepat* 2007; **14**(6): 413-8.
41. Vallejo F, Barrio G, Brugal MT, et al. High hepatitis C virus prevalence and incidence in a community cohort of young heroin injectors in a context of extensive harm reduction programmes. *J Epidemiol Community Health* 2015; **69**(6): 599-603.
